# Supplementary material for: Proteome-Wide Analyses Provide New Insights into the Compatible Interaction of Rice with the Root-Knot Nematode Meloidogyne graminicola
Source: PubMed Central journal article supplement (PMC7460654; doi:10.3390/ijms21165640), 2020-08-06
Supplement: ijms-21-05640-s001.pdf [file ijms-21-05640-s001.pdf]

## Supplementary Materials

### **Proteome-Wide Analyses Provide New Insights into the Compatible Interaction of Rice with Root-Knot Nematode *Meloidogyne graminicola***

Chao Xiang<sup>1,†</sup>, Xiaoping Yang<sup>2,†</sup>, Deliang Peng<sup>1</sup>, Houxiang Kang<sup>1</sup>, Maoyan Liu<sup>1,3</sup>, Wei Li<sup>3</sup>,  
Wenkun Huang<sup>1,\*</sup>, Shiming Liu<sup>1,\*</sup>

<sup>1</sup> State Key Laboratory for Biology of Plant Diseases and Insect Pests, Institute of Plant Protection, Chinese Academy of Agricultural Sciences, Beijing 100193, P. R. China

<sup>2</sup> Hunan Biological and Electromechanical Polytechnic, Changsha 410127, P. R. China

<sup>3</sup> College of Plant Protection, Hunan Agricultural University, Changsha 410128, P. R. China

† These authors equally contributed to this work

\* Correspondence: [smluahn@yahoo.com](mailto:smluahn@yahoo.com) (S.L.); [wkhuang@ippcaas.cn](mailto:wkhuang@ippcaas.cn) (W.H.)

**Figure S1.** Volcano plots of the relative protein abundance changes of all the identified proteins in the roots of NPB with or without infection of *M. graminicola*.

**Figure S2.** Clustering heatmaps of the three biological replicates.

**Figure S3.** GO and KEGG enrichment analyses using all the specifically expressed proteins and SDEPs of NPB roots in CK1DPI\_versus\_CK0, CK3DPI\_versus\_CK0, or CK7DPI\_versus\_CK0.

**Figure S4.** GO and KEGG enrichment analyses of the specifically expressed proteins and SDEPs of the NPB roots in the whole CK\_versus\_CK0 group.

**Figure S5.** Compatible interaction of *japonica* rice cultivar Nipponbare (NPB) with *M. graminicola*.

**Table S1** List of the specifically expressed proteins and significantly differentially expressed proteins (SDEPs) in the roots of rice NPB uniquely caused by the infection of *M. graminicola*.

**Table S2** List of the primers used in this study.

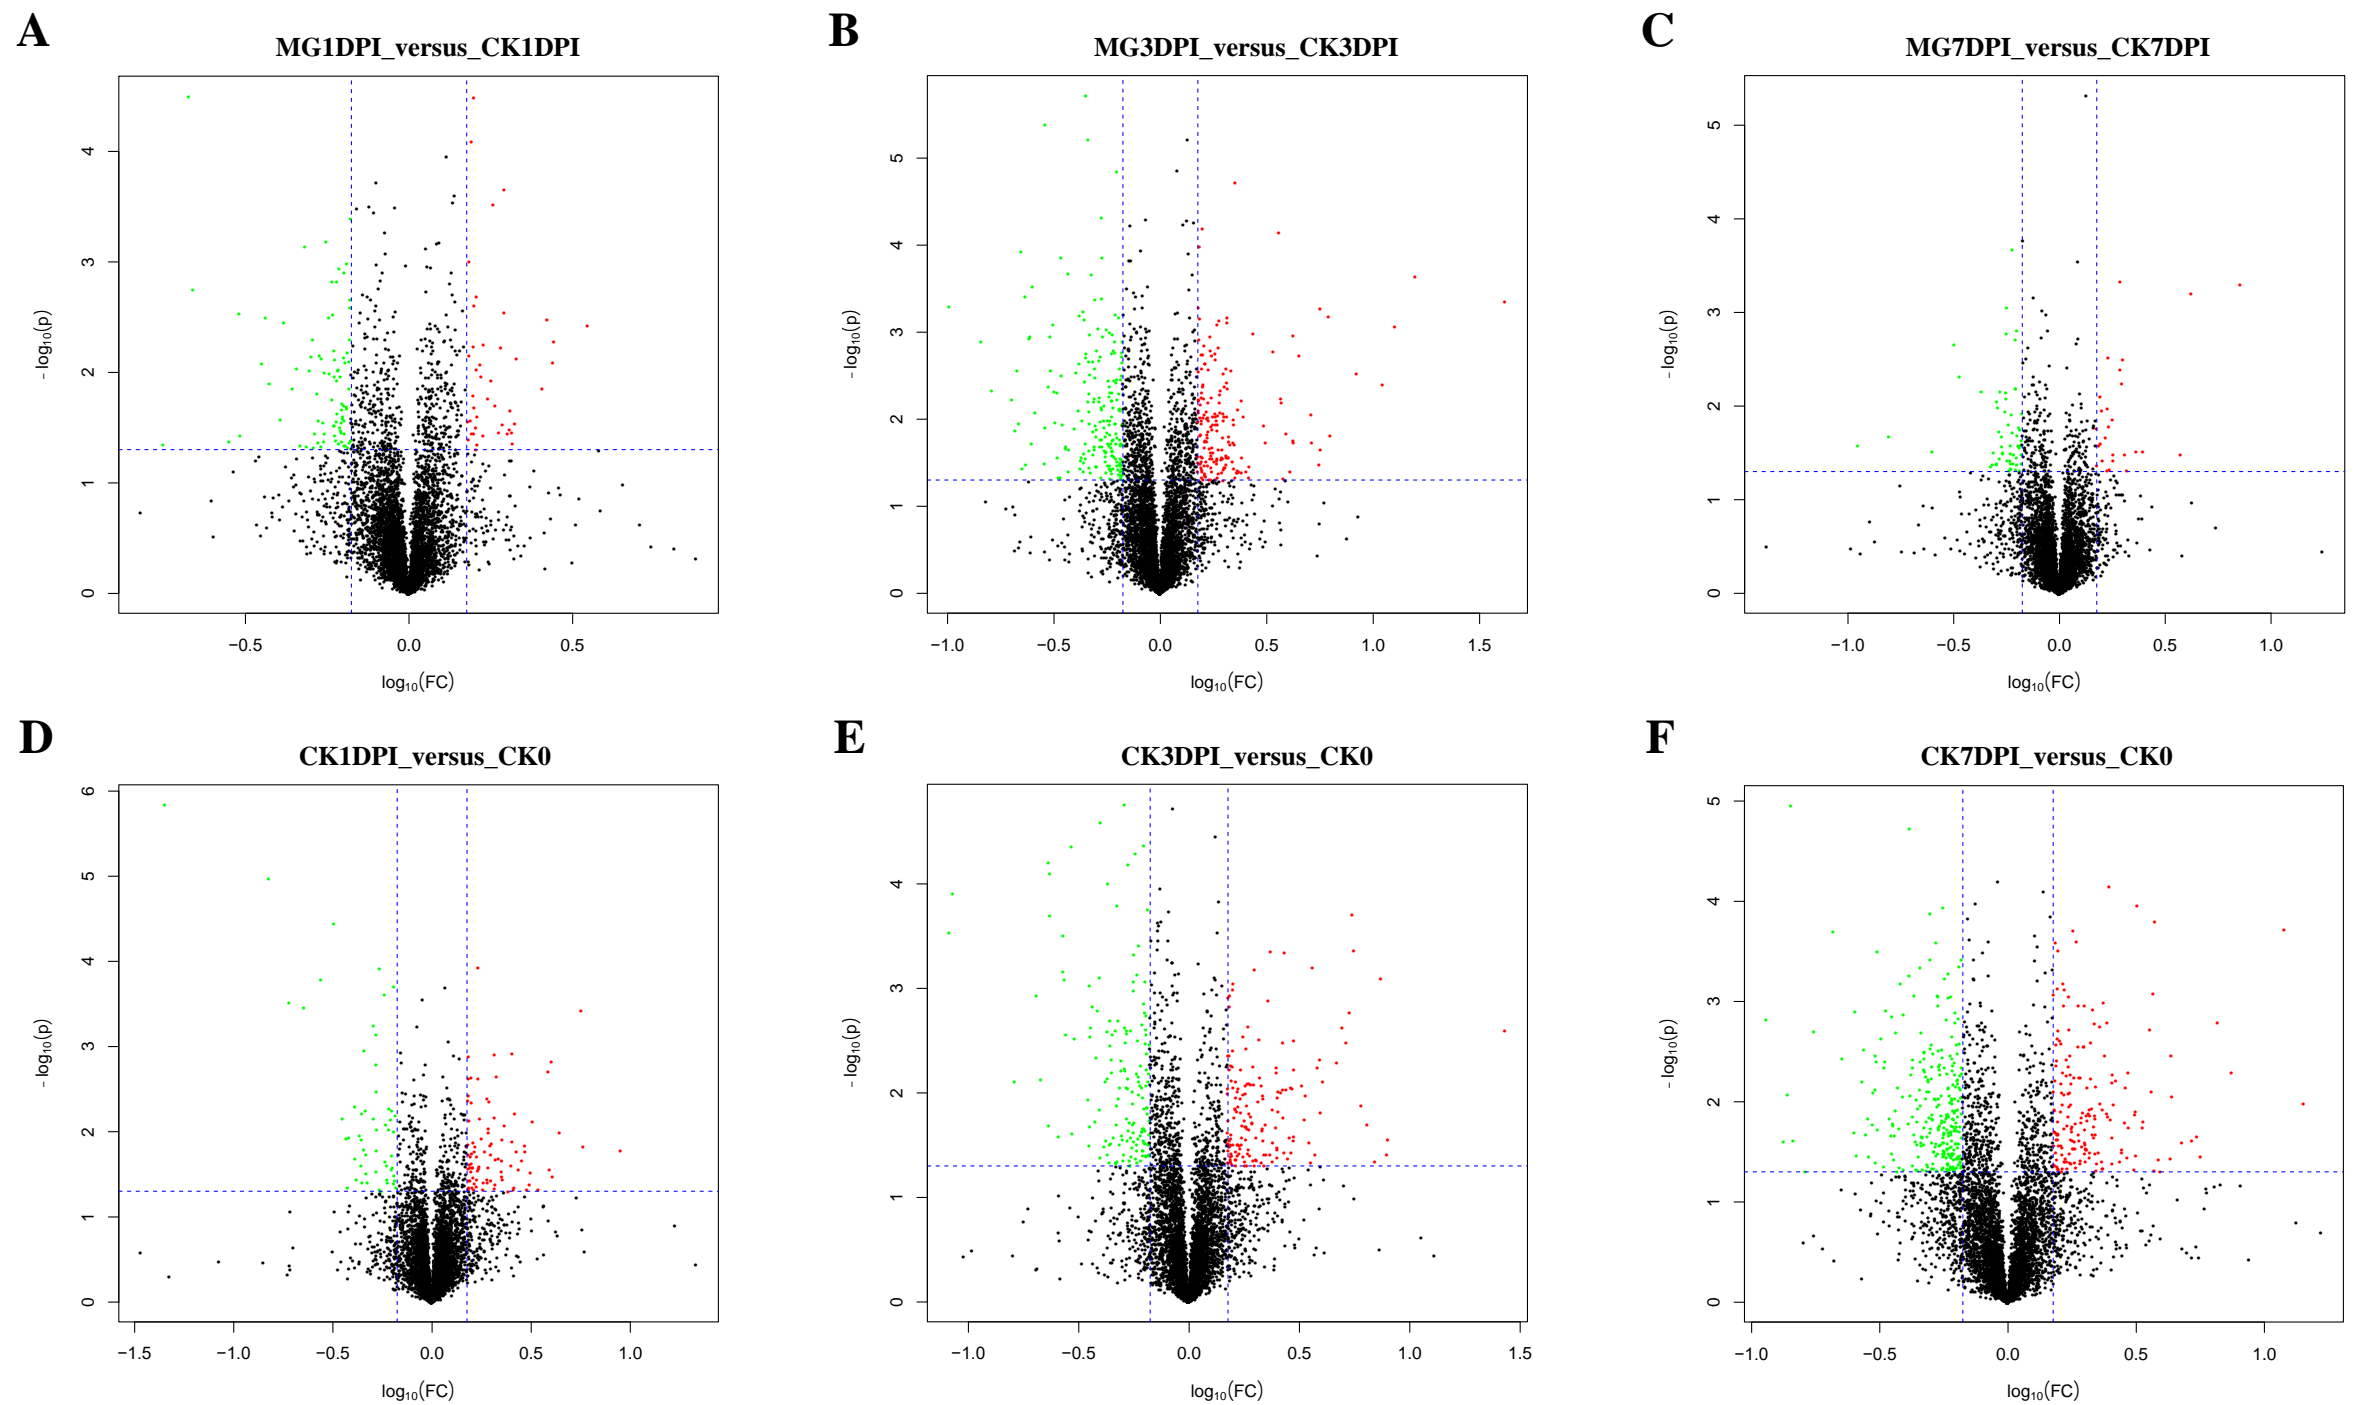

**Figure S1.** Volcano plots of the relative protein abundance changes of all the identified proteins in the roots of NPB with or without infection of *M. graminicola*. (A)-(F) Volcano plots of the relative protein abundance changes of all the identified proteins in MG1DPI\_versus\_CK1DPI, MG3DPI\_versus\_CK3DPI, MG7DPI\_versus\_CK7DPI, CK1DPI\_versus\_CK0, CK3DPI\_versus\_CK0, and CK7DPI\_versus\_CK0, respectively. Red and green dots indicate the proteins that are significantly up-regulated and significantly down-regulated, respectively.

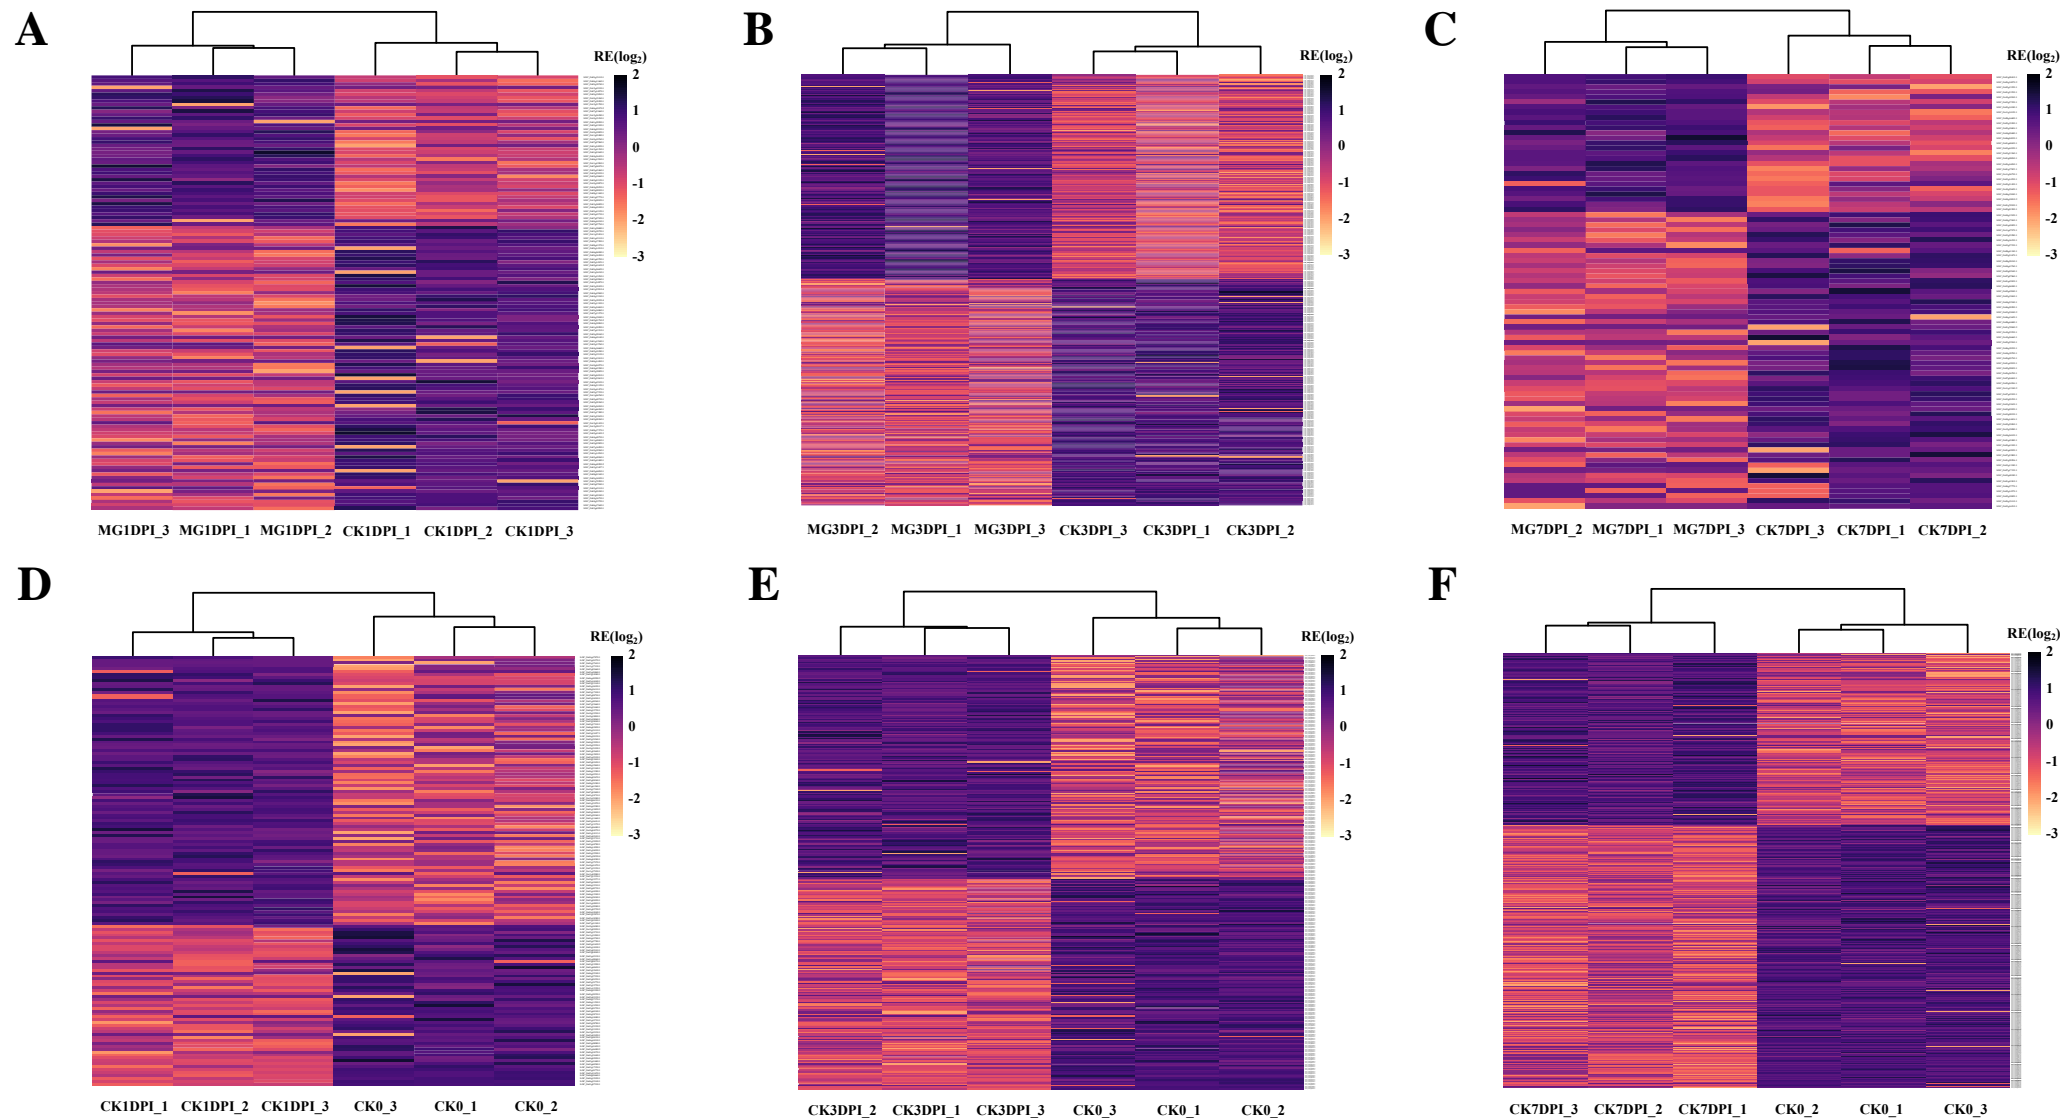

**Figure S2.** Clustering heatmaps of the three biological replicates. (A)-(F) Clustering heatmaps of MG1DPI\_versus\_CK1DPI, MG3DPI\_versus\_CK3DPI, MG7DPI\_versus\_CK7DPI, CK1DPI\_versus\_CK0, CK3DPI\_versus\_CK0, and CK7DPI\_versus\_CK0, respectively.

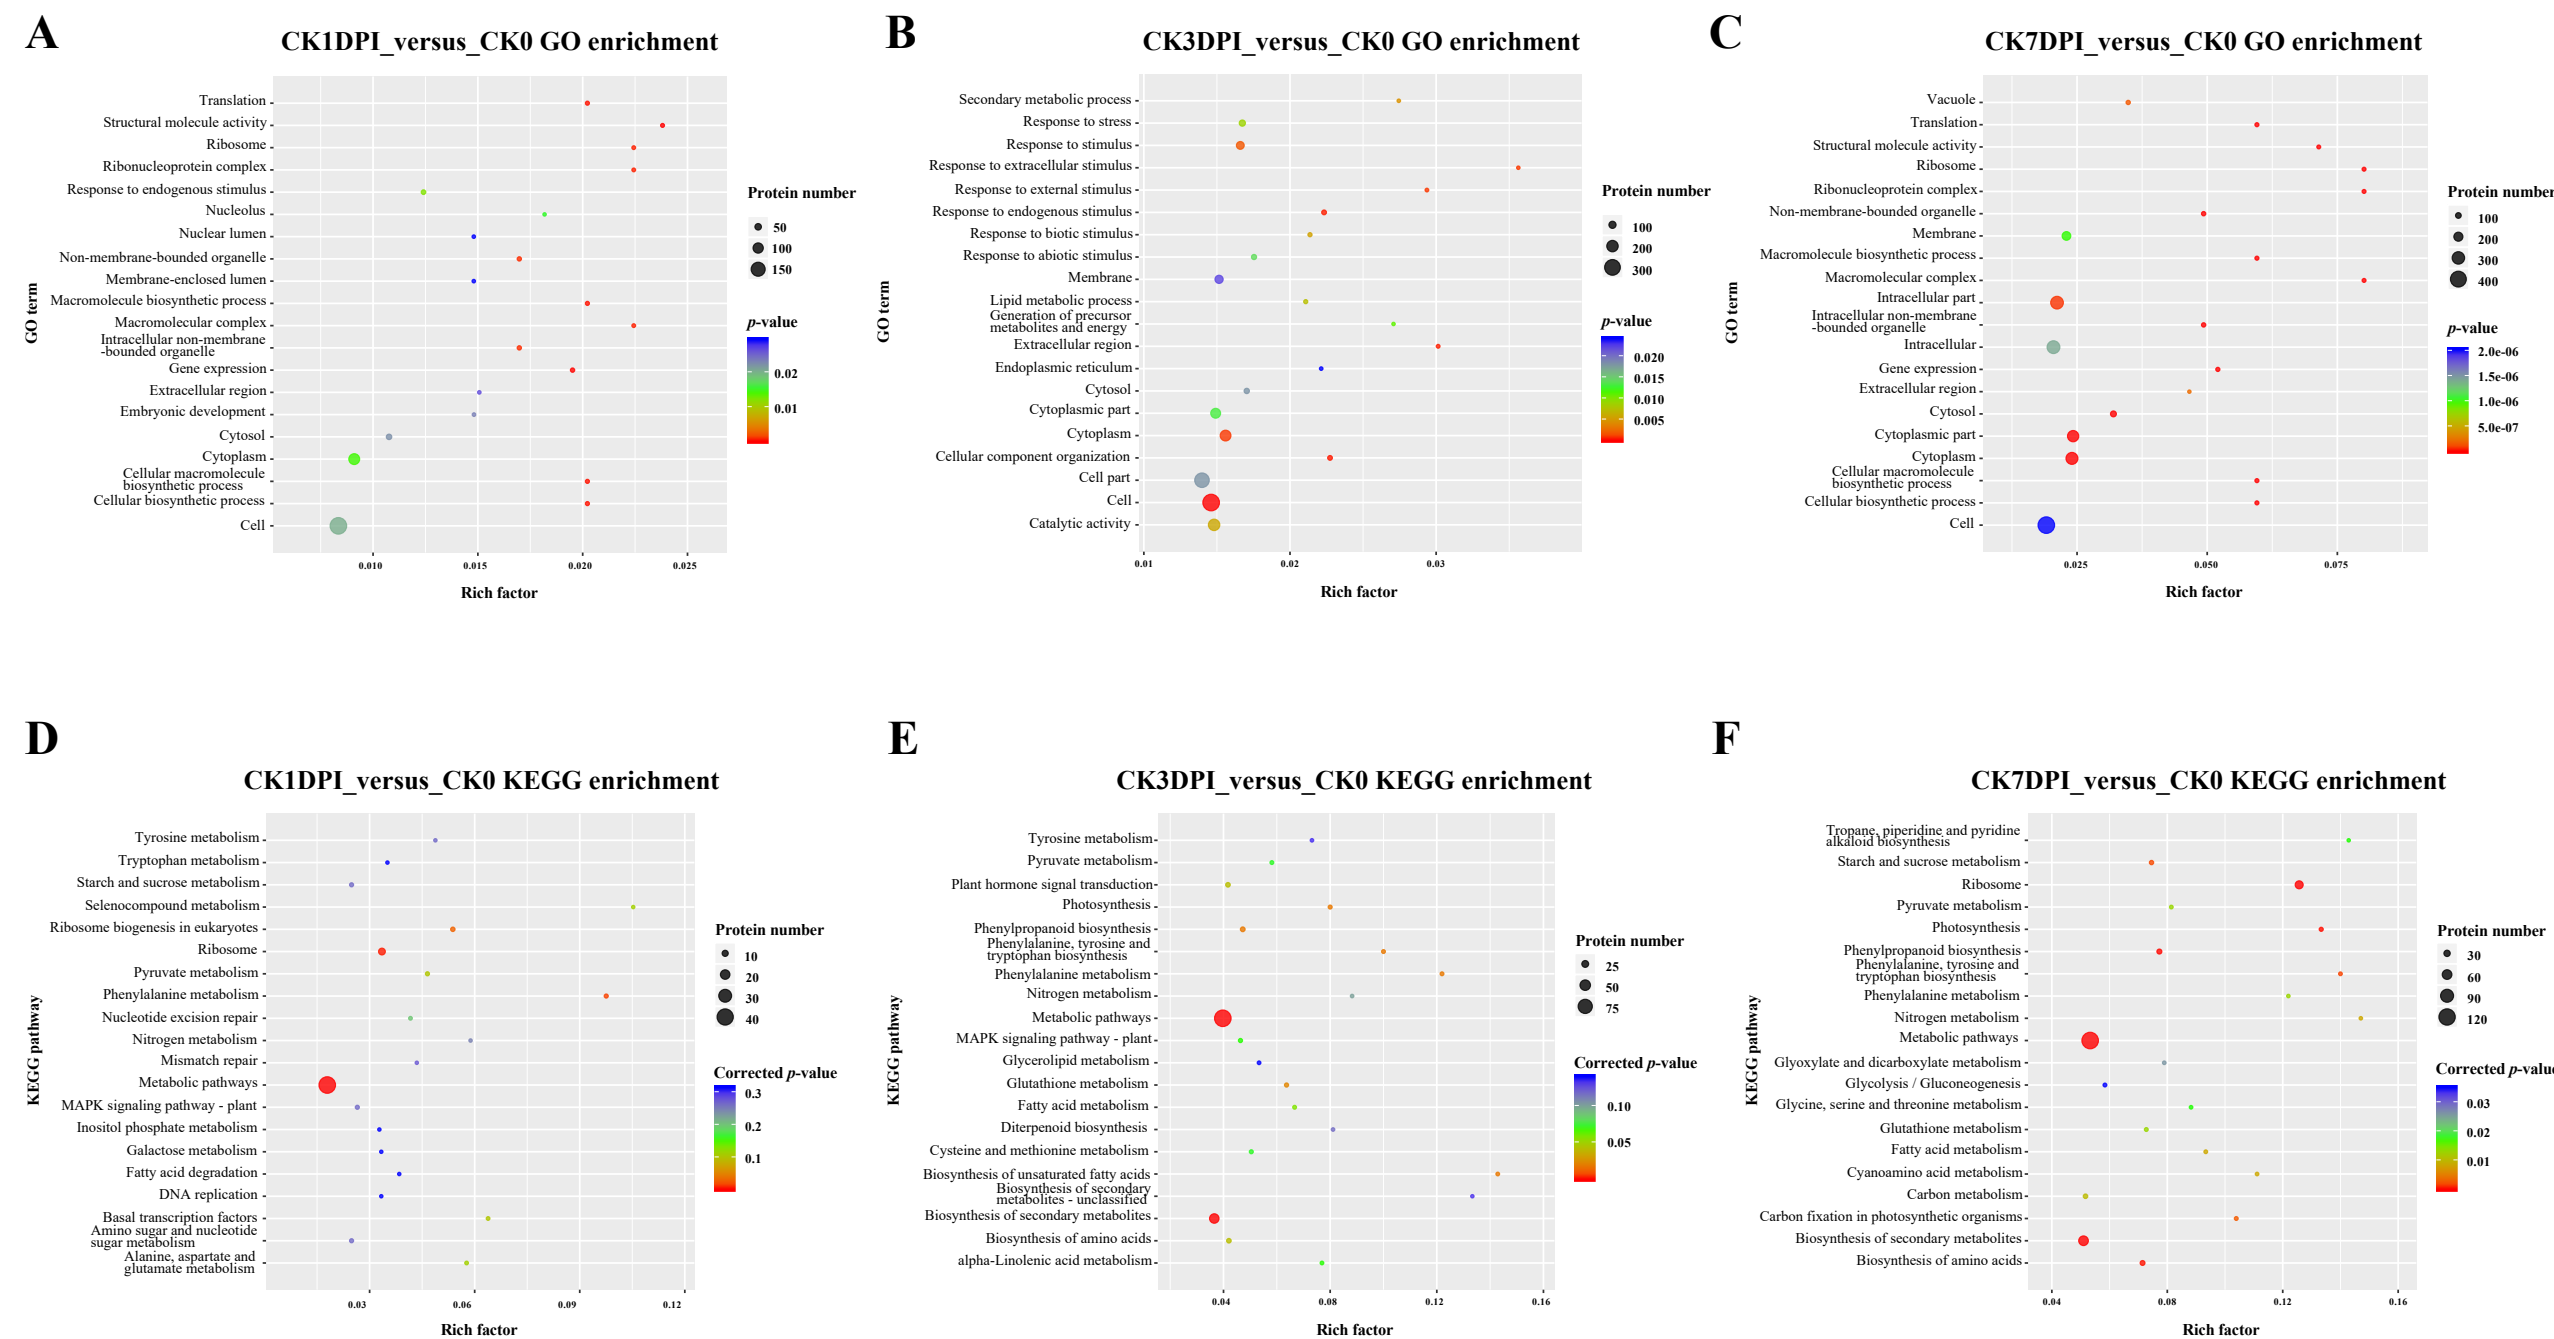

**Figure S3.** GO and KEGG enrichment analyses using all the specifically expressed proteins and SDEPs of NPB roots in CK1DPI\_versus\_CK0, CK3DPI\_versus\_CK0, or CK7DPI\_versus\_CK0. (A)-(C) GO enrichment analyses in CK1DPI\_versus\_CK0, CK3DPI\_versus\_CK0, and CK7DPI\_versus\_CK0, respectively. (D)-(F) KEGG enrichment analyses in CK1DPI\_versus\_CK0, CK3DPI\_versus\_CK0, and CK7DPI\_versus\_CK0, respectively.

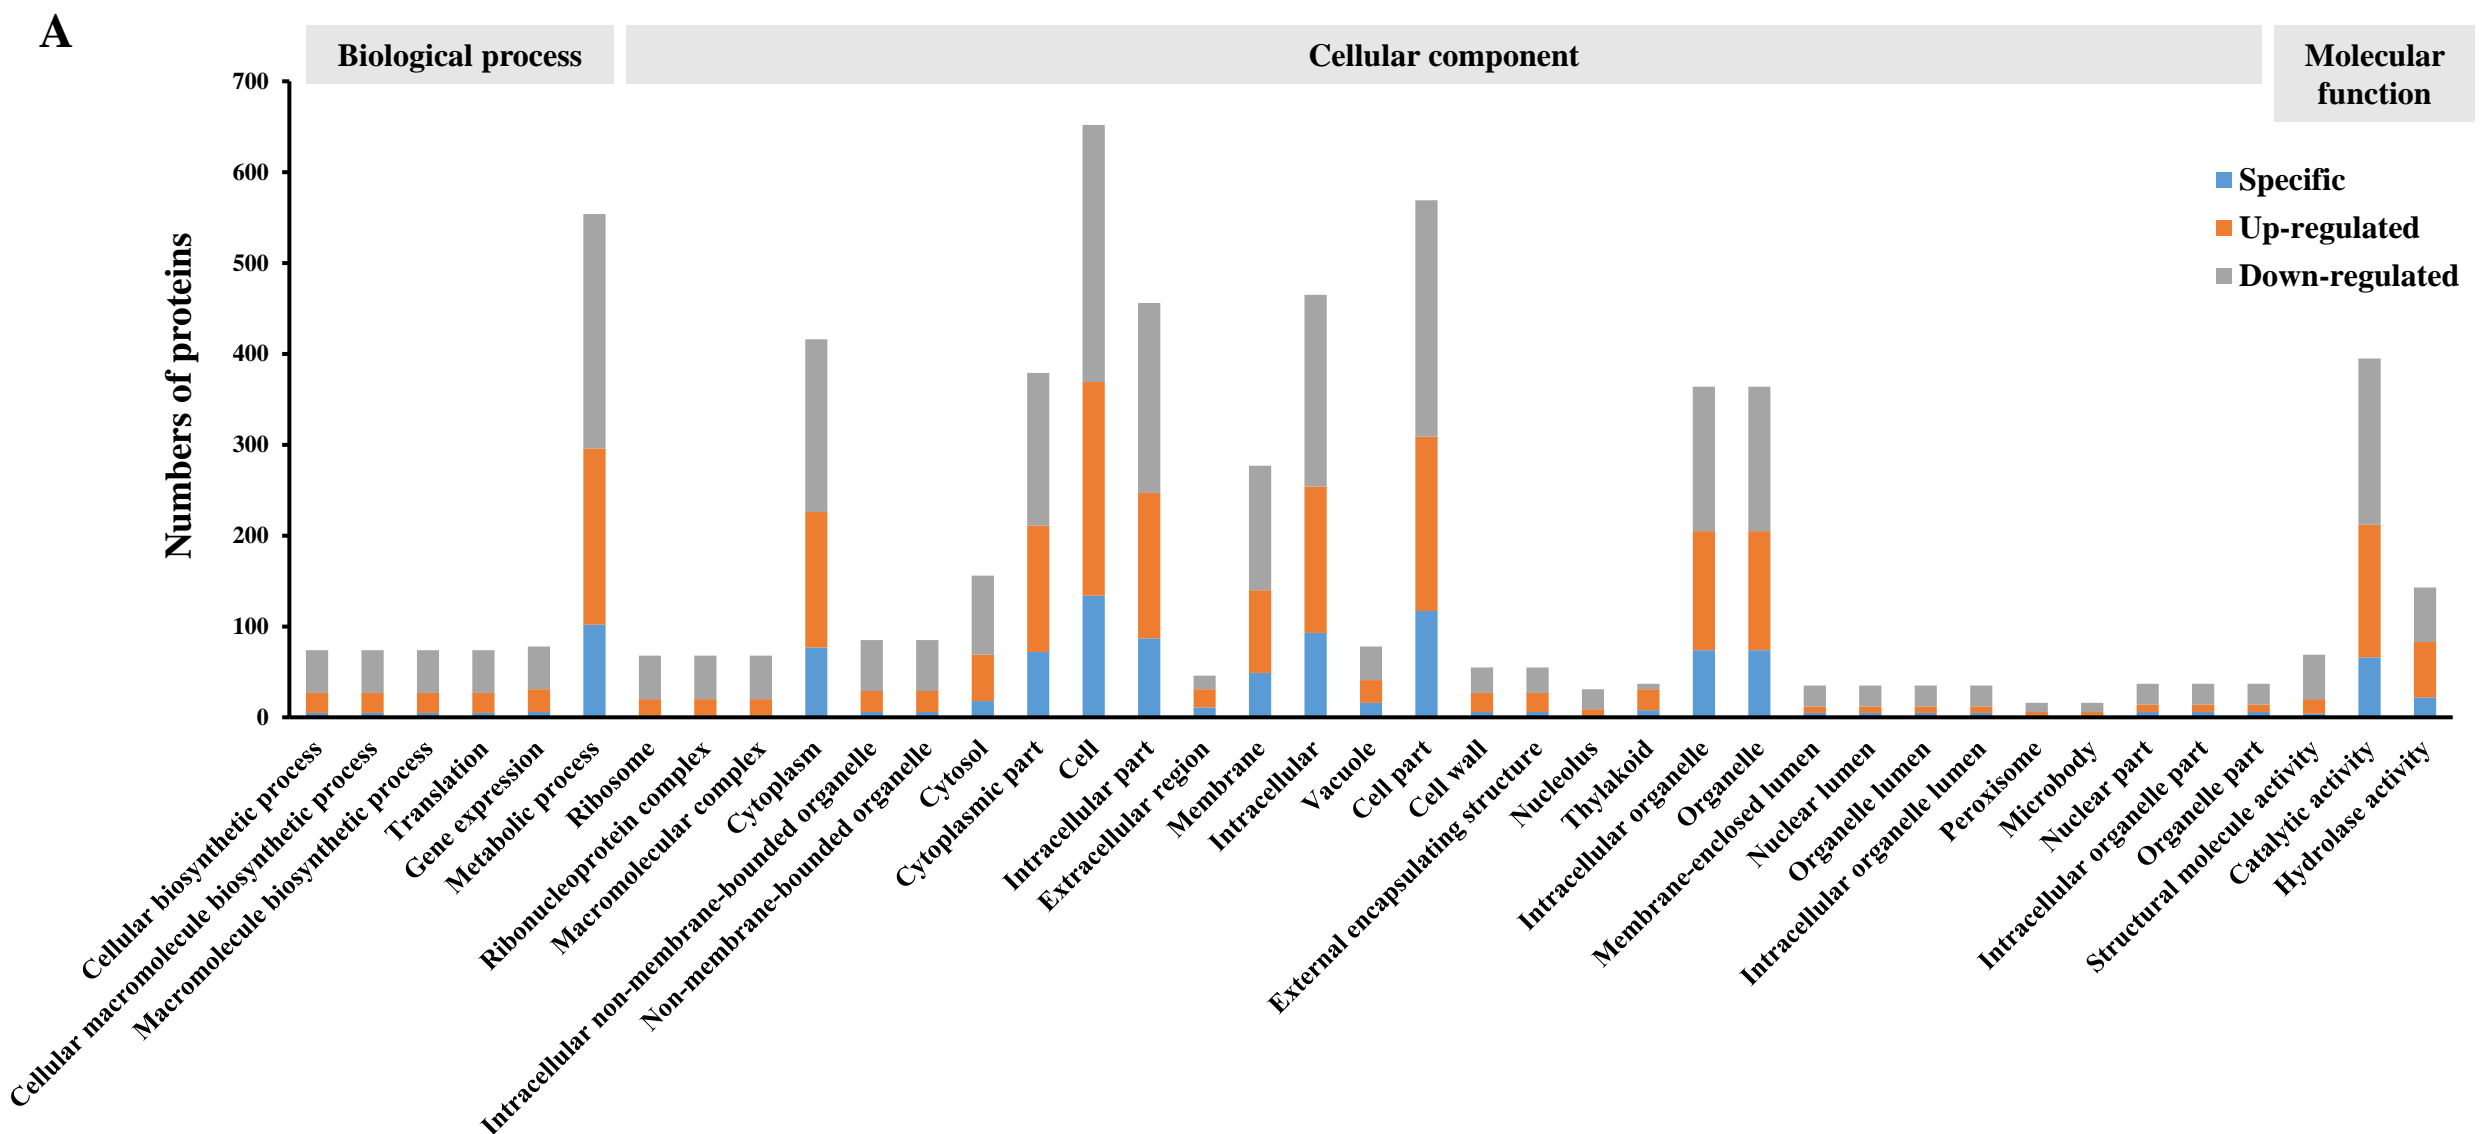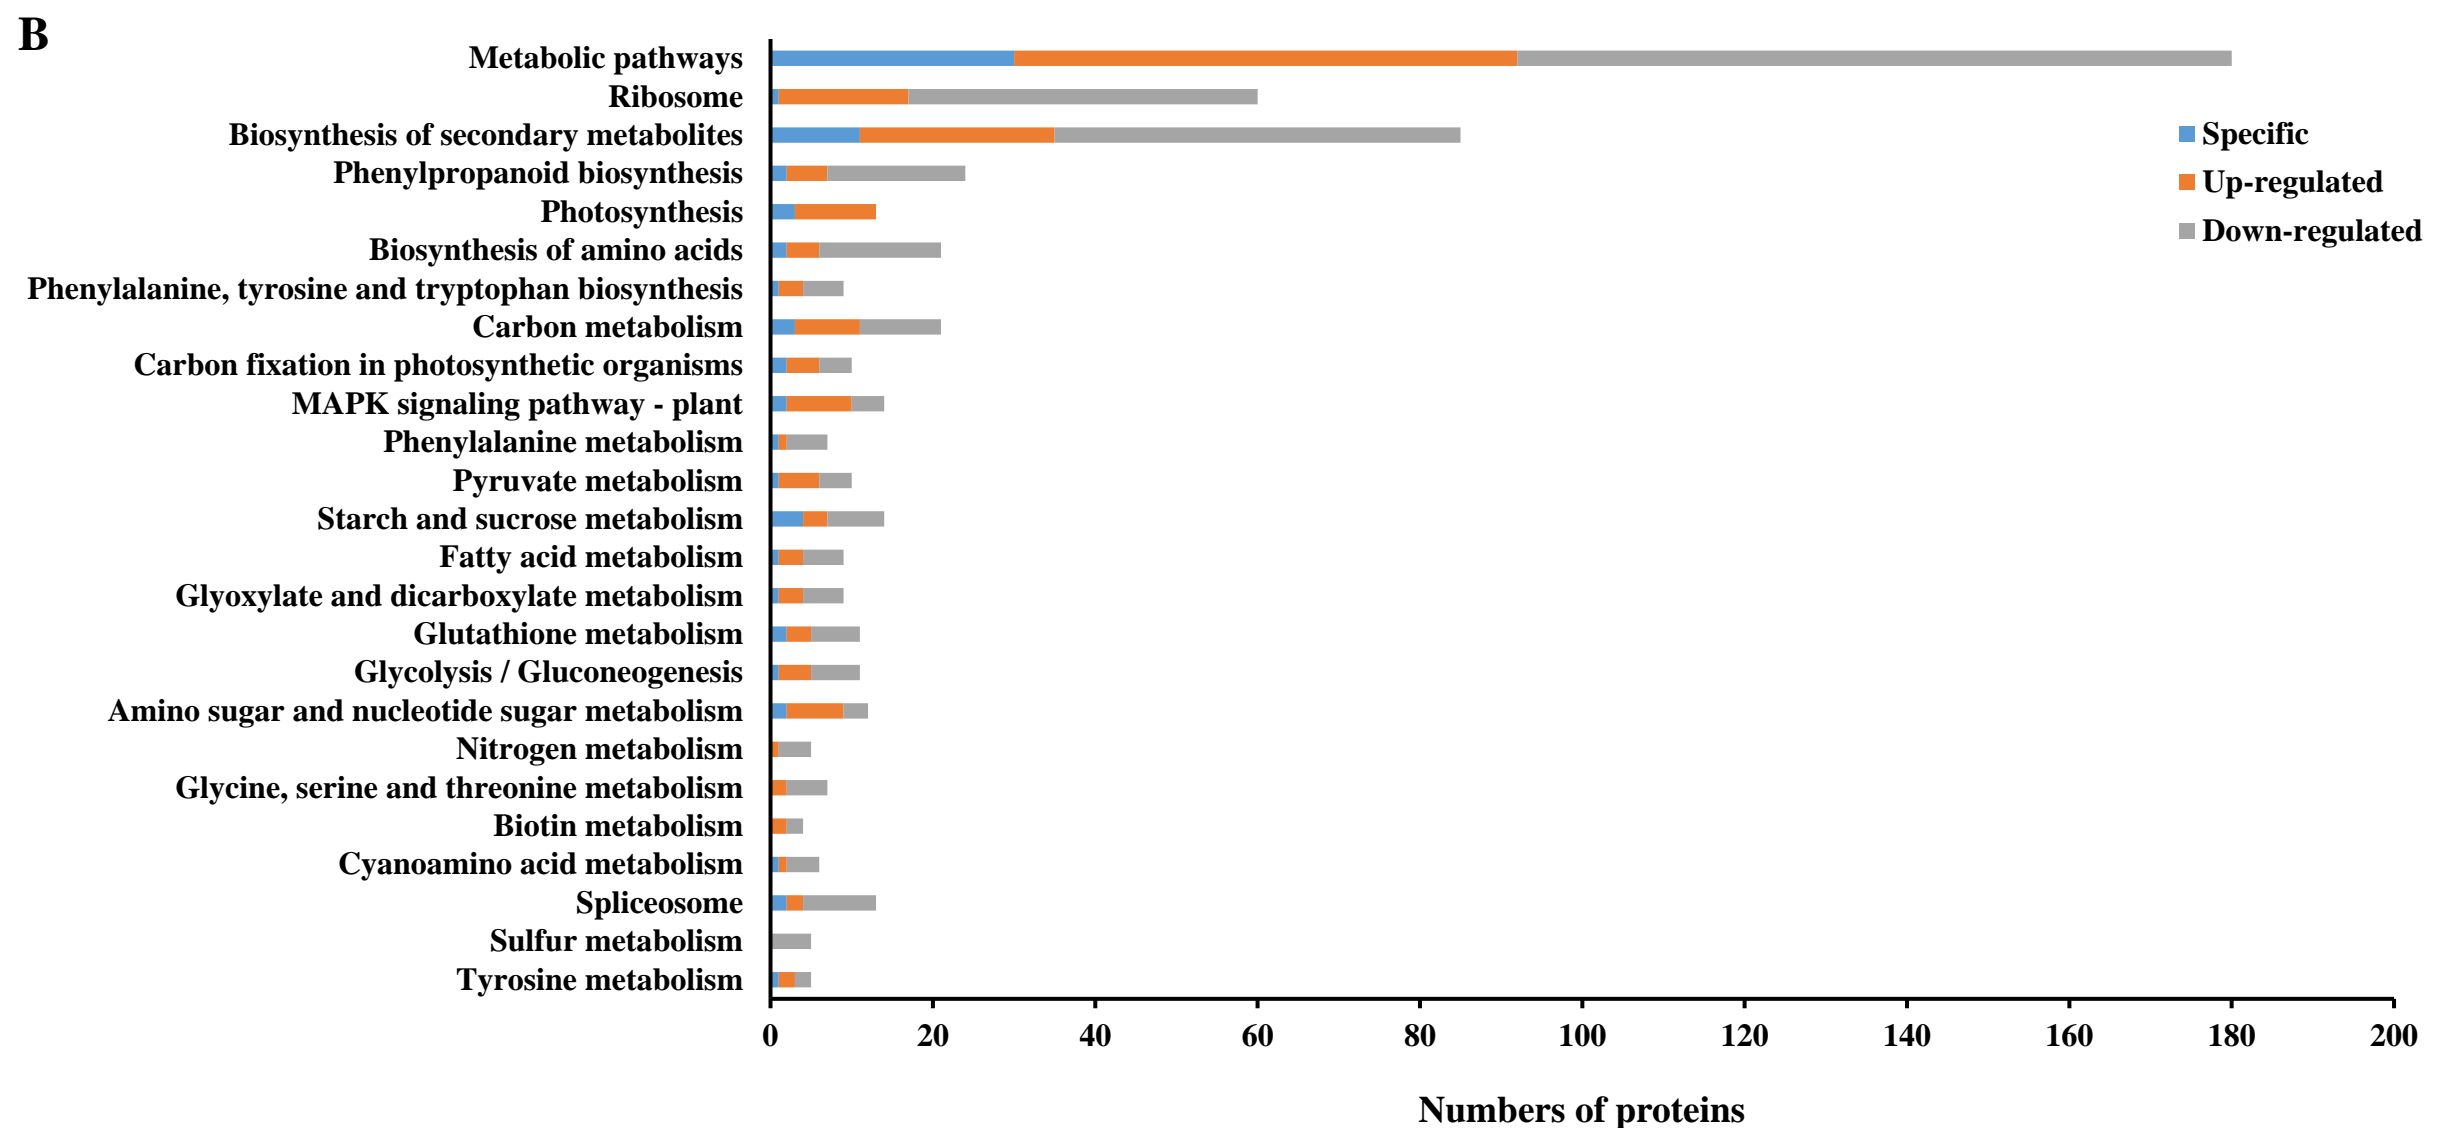

**Figure S4.** GO and KEGG enrichment analyses of all the specifically expressed proteins and SDEPs of the NPB roots in the whole CK\_versus\_CK0 group. **(A)** GO enrichment analyses. **(B)** KEGG pathway enrichment analyses.



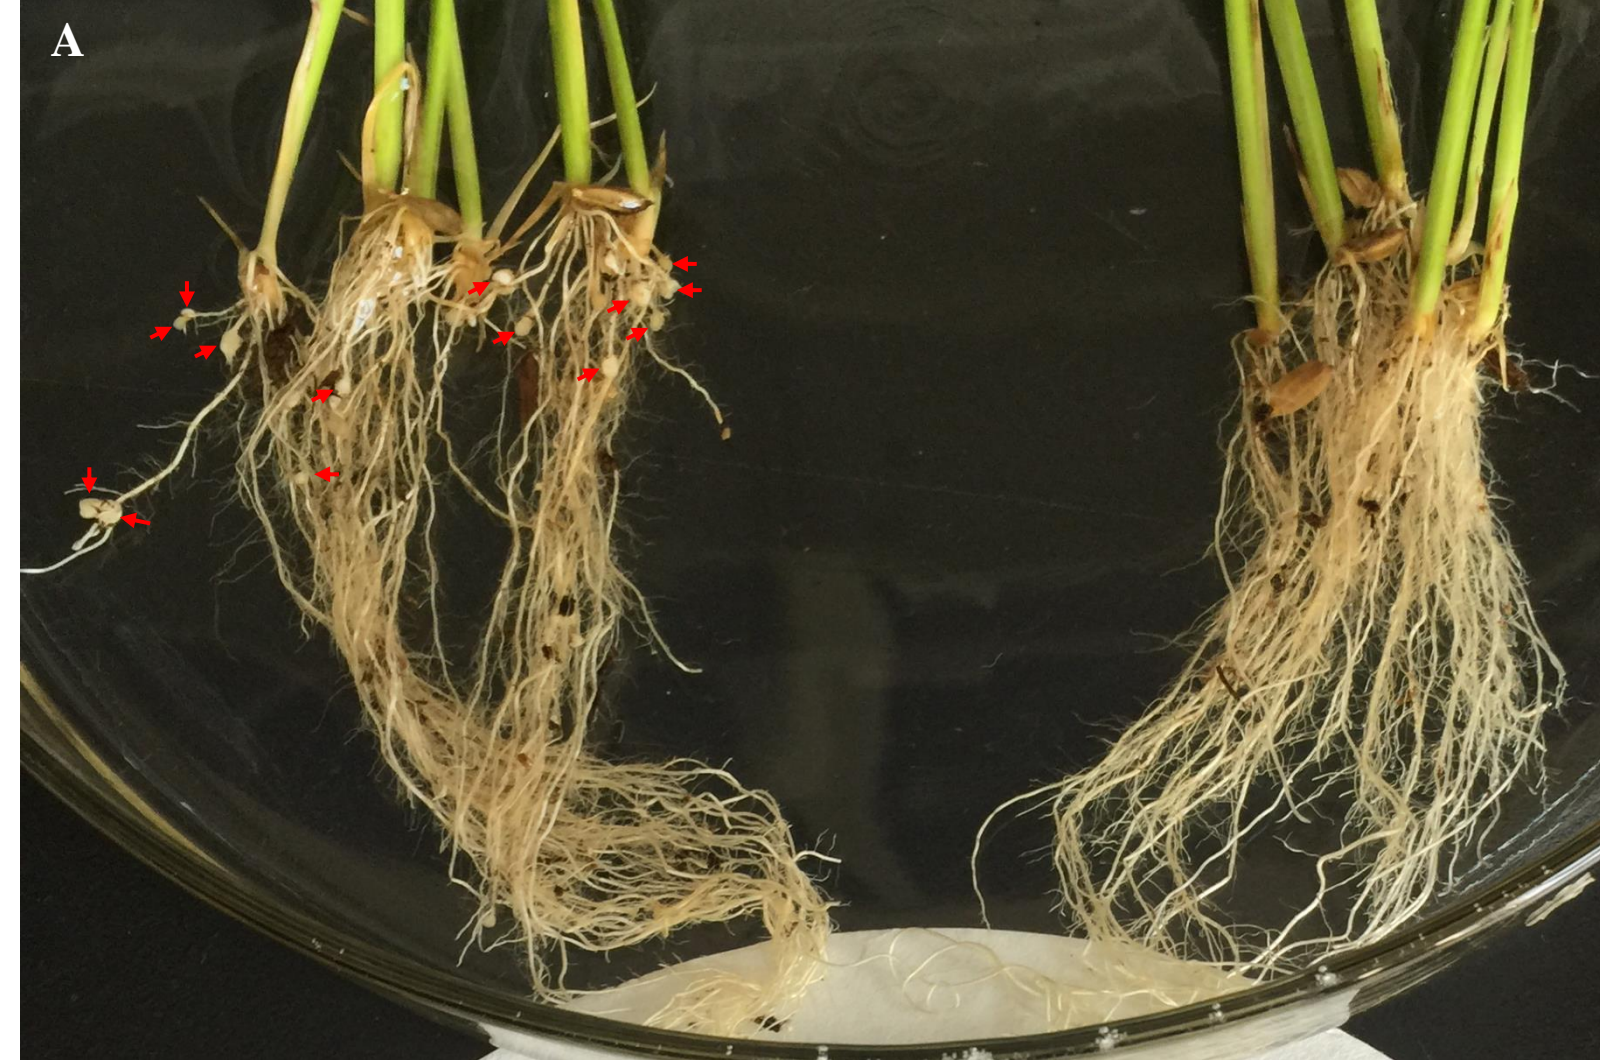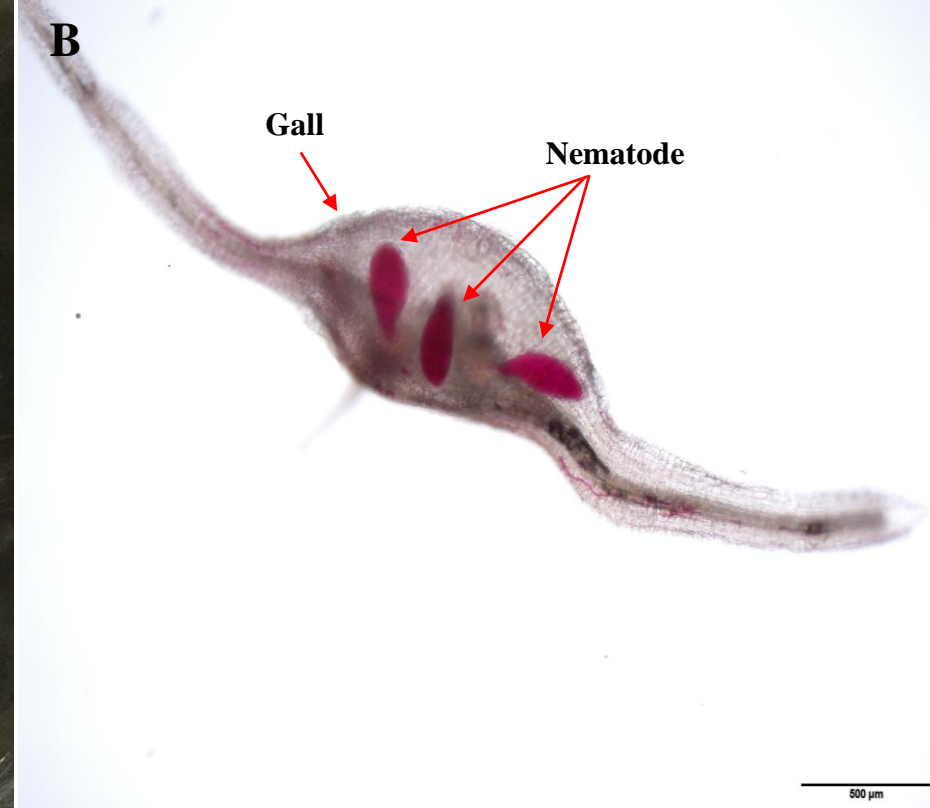

**Figure S5.** Compatible interaction of *japonica* rice cultivar Nipponbare (NPB) with *M. graminicola*. **(A)** Partial seedlings of NPB at 7 dpi of *M. graminicola*. Left and right pictures are the partial seedlings with and without inoculation, respectively. Many galls (red arrows directed) already emerged on the roots inoculated with *M. graminicola* at 7 dpi, but no galls appeared on the non-inoculated roots at the same growth day. **(B)** One representative gall on the roots with 3 stained nematodes (purple) inside observed under a stereomicroscopy at 7 dpi.

**Table S1** List of the specifically expressed proteins and significantly differentially expressed proteins (SDEPs) in the roots of rice NPB uniquely caused by the infection of *M. graminicola*. Totally, 513 proteins were obtained. 'Specific', 'Up' and 'Down' denote specifically expressed proteins, up-regulated SDEPs and down-regulated SDEPs, respectively. The former 99 proteins were enriched on the KEGG pathways. The blue-highlighted are the speciallyselected proteins.

| No. | Accession No.    | Description                                                                             | Gene ID              | Expression        | KEGG pathway                                                                                                                        |
|-----|------------------|-----------------------------------------------------------------------------------------|----------------------|-------------------|-------------------------------------------------------------------------------------------------------------------------------------|
| 1   | LOC_Os12g08780.1 | flavin monooxygenase, putative, expressed                                               | dosa:Os12t0189500-00 | Specific          | Tryptophan metabolism;Metabolic pathways                                                                                            |
| 2   | LOC_Os03g16210.1 | tropinone reductase, putative, expressed                                                | osa:4332375          | Specific and Down | Tropane, piperidine and pyridine alkaloid biosynthesis;Metabolic pathways;Biosynthesis of secondary metabolites                     |
| 3   | LOC_Os11g25160.1 | tropinone reductase 2, putative, expressed                                              | dosa:Os11t0438700-01 | Down              | Tropane, piperidine and pyridine alkaloid biosynthesis;Metabolic pathways;Biosynthesis of secondary metabolites                     |
| 4   | LOC_Os12g09000.1 | phosphomethylpyrimidine kinase/thiamin-phosphate pyrophosphorylase, putative, expressed | osa:4351707          | Specific          | Thiamine metabolism;Metabolic pathways                                                                                              |
| 5   | LOC_Os05g30454.1 | thiamin pyrophosphokinase 1, putative, expressed                                        | osa:4338566          | Down              | Thiamine metabolism;Metabolic pathways                                                                                              |
| 6   | LOC_Os03g52180.1 | 4-hydroxy-3-methylbut-2-enyl diphosphate reductase, putative, expressed                 | osa:4334004          | Specific          | Terpenoid backbone biosynthesis;Metabolic pathways;Biosynthesis of secondary metabolites                                            |
| 7   | LOC_Os05g34180.1 | hydrolase, NUDIX family, domain containing protein, expressed                           | osa:4338791          | Up                | Terpenoid backbone biosynthesis;Metabolic pathways;Biosynthesis of secondary metabolites                                            |
| 8   | LOC_Os01g66360.1 | 2-C-methyl-D-erythritol 4-phosphate cytidyltransferase, putative, expressed             | osa:9266653          | Down              | Terpenoid backbone biosynthesis;Metabolic pathways;Biosynthesis of secondary metabolites                                            |
| 9   | LOC_Os01g05810.1 | gamma-glutamyltranspeptidase 1 precursor, putative, expressed                           | osa:4324525          | Up                | Taurine and hypotaurine metabolism;Cyanoamino acid metabolism;Glutathione metabolism;Arachidonic acid metabolism;Metabolic pathways |
| 10  | LOC_Os03g59040.2 | squalene synthetase, putative, expressed                                                | osa:4334492          | Down              | Steroid biosynthesis;Sesquiterpenoid and triterpenoid biosynthesis;Metabolic pathways;Biosynthesis of secondary metabolites         |
| 11  | LOC_Os06g49970.2 | alpha-amylase precursor, putative, expressed                                            | osa:4342055          | Up and Down       | Starch and sucrose metabolism;Metabolic pathways                                                                                    |
| 12  | LOC_Os07g32600.1 | glucan endo-1,3-beta-glucosidase precursor, putative, expressed                         | osa:4343350          | Specific          | Starch and sucrose metabolism;Metabolic pathways                                                                                    |
| 13  | LOC_Os02g47350.1 | oxidoreductase, short chain dehydrogenase/reductase family, putative, expressed         | osa:4330439          | Up                | Sphingolipid metabolism;Metabolic pathways                                                                                          |
| 14  | LOC_Os03g02600.1 | riboflavin biosynthesis protein ribD, putative, expressed                               | dosa:Os03t0117200-01 | Down              | Riboflavin metabolism;Metabolic pathways;Biosynthesis of secondary metabolites                                                      |

|    |                        |                                                                          |                      |             |                                                                                                                                         |
|----|------------------------|--------------------------------------------------------------------------|----------------------|-------------|-----------------------------------------------------------------------------------------------------------------------------------------|
| 15 | LOC_Os01g11054.1       | phosphoenolpyruvate carboxylase, putative, expressed                     | osa:4325531          | Down        | Pyruvate metabolism;Carbon fixation in photosynthetic organisms;Metabolic pathways;Carbon metabolism                                    |
| 16 | LOC_Os03g31750.3       | pyruvate, phosphate dikinase, chloroplast precursor, putative, expressed | osa:4333181          | Down        | Pyruvate metabolism;Carbon fixation in photosynthetic organisms;Metabolic pathways;Carbon metabolism                                    |
| 17 | LOC_Os01g70950.1       | spermatogenesis-associated protein 20 precursor, putative, expressed     | osa:4326794          | Up          | Pyrimidine metabolism;Metabolic pathways                                                                                                |
| 18 | LOC_Os06g02000.1       | adenylate kinase, putative, expressed                                    | osa:4339882          | Down        | Pyrimidine metabolism;Metabolic pathways                                                                                                |
| 19 | LOC_Os03g44660.1       | cytosolic 5-nucleotidase III, putative, expressed                        | osa:4333582          | Down        | Purine metabolism;Pyrimidine metabolism;Nicotinate and nicotinamide metabolism;Metabolic pathways;Biosynthesis of secondary metabolites |
| 20 | LOC_Os05g08950.1       | phosphoribosyl transferase, putative, expressed                          | osa:107276353        | Up          | Purine metabolism;Metabolic pathways;Biosynthesis of secondary metabolites                                                              |
| 21 | LOC_Os01g64520.1       | uricase, putative, expressed                                             | osa:4324793          | Down        | Purine metabolism;Metabolic pathways                                                                                                    |
| 22 | LOC_Os05g06940.1       | relA-SpoT like protein RSH4, putative, expressed                         | osa:9270381          | Specific    | Purine metabolism;Metabolic pathways                                                                                                    |
| 23 | LOC_Os01g07770.1       | peroxidase precursor, putative, expressed                                | osa:4327648          | Up and Down | Phenylpropanoid biosynthesis;Metabolic pathways;Biosynthesis of secondary metabolites                                                   |
| 24 | LOC_Os12g08920.1       | peroxidase precursor, putative, expressed                                | dosa:Os12t0191500-01 | Up and Down | Phenylpropanoid biosynthesis;Metabolic pathways;Biosynthesis of secondary metabolites                                                   |
| 25 | LOC_Os11g40690.1       | dehydrogenase, putative, expressed                                       | dosa:Os11t0622800-00 | Up and Down | Phenylpropanoid biosynthesis;Metabolic pathways;Biosynthesis of secondary metabolites                                                   |
| 26 | LOC_Os05g04500.1       | peroxidase precursor, putative, expressed                                | osa:4337732          | Up          | Phenylpropanoid biosynthesis;Metabolic pathways;Biosynthesis of secondary metabolites                                                   |
| 27 | LOC_Os09g23530.1       | dehydrogenase, putative, expressed                                       | osa:4346988          | Up          | Phenylpropanoid biosynthesis;Metabolic pathways;Biosynthesis of secondary metabolites                                                   |
| 28 | LOC_Os03g25280.1       | peroxidase precursor, putative, expressed                                | dosa:Os03t0368000-00 | Down        | Phenylpropanoid biosynthesis;Metabolic pathways;Biosynthesis of secondary metabolites                                                   |
| 29 | LOC_Os07g01410.1       | peroxidase precursor, putative, expressed                                | sita:101755700       | Down        | Phenylpropanoid biosynthesis;Metabolic pathways;Biosynthesis of secondary metabolites                                                   |
| 30 | LOC_Os01g73200.1       | peroxidase precursor, putative, expressed                                | osa:4324556          | Down        | Phenylpropanoid biosynthesis;Metabolic pathways;Biosynthesis of secondary metabolites                                                   |
| 31 | LOC_Os09g23560.1 (CAD) | dehydrogenase, putative, expressed                                       | osa:4346993          | Down        | Phenylpropanoid biosynthesis;Metabolic pathways;Biosynthesis of secondary metabolites                                                   |



|    |                  |                                                                        |                      |             |                                                                                                                                                                                                                         |
|----|------------------|------------------------------------------------------------------------|----------------------|-------------|-------------------------------------------------------------------------------------------------------------------------------------------------------------------------------------------------------------------------|
| 32 | LOC_Os02g14160.1 | peroxidase precursor, putative, expressed                              | osa:4328832          | Down        | Phenylpropanoid biosynthesis;Metabolic pathways;Biosynthesis of secondary metabolites                                                                                                                                   |
| 33 | LOC_Os03g22020.1 | peroxidase precursor, putative, expressed                              | osa:9272450          | Down        | Phenylpropanoid biosynthesis;Metabolic pathways;Biosynthesis of secondary metabolites                                                                                                                                   |
| 34 | LOC_Os03g25320.1 | peroxidase precursor, putative, expressed                              | sita:101771235       | Down        | Phenylpropanoid biosynthesis;Metabolic pathways;Biosynthesis of secondary metabolites                                                                                                                                   |
| 35 | LOC_Os06g06980.1 | caffeoyl-CoA O-methyltransferase, putative, expressed                  | osa:4340240          | Down        | Phenylpropanoid biosynthesis;Flavonoid biosynthesis;Stilbenoid, diarylheptanoid and gingerol biosynthesis;Metabolic pathways;Biosynthesis of secondary metabolites;Biosynthesis of secondary metabolites - unclassified |
| 36 | LOC_Os04g33390.1 | prephenate dehydratase domain containing protein, expressed            | osa:4335756          | Down        | Phenylalanine, tyrosine and tryptophan biosynthesis;Metabolic pathways;Biosynthesis of secondary metabolites;Biosynthesis of amino acids                                                                                |
| 37 | LOC_Os08g43370.1 | 6-phosphogluconolactonase, putative, expressed                         | osa:4346232          | Down        | Pentose phosphate pathway;Metabolic pathways;Biosynthesis of secondary metabolites;Carbon metabolism                                                                                                                    |
| 38 | LOC_Os07g08030.1 | ribose-5-phosphate isomerase A, putative, expressed                    | osa:4342543          | Up          | Pentose phosphate pathway;Carbon fixation in photosynthetic organisms;Metabolic pathways;Biosynthesis of secondary metabolites;Carbon metabolism;Biosynthesis of amino acids                                            |
| 39 | LOC_Os02g54880.1 | cytochrome c oxidase subunit, putative, expressed                      | osa:4330974          | Specific    | Oxidative phosphorylation;Metabolic pathways                                                                                                                                                                            |
| 40 | LOC_Os05g45730.1 | ubiquinone oxidoreductase, putative, expressed                         | osa:4339427          | Up          | Oxidative phosphorylation;Metabolic pathways                                                                                                                                                                            |
| 41 | LOC_Os07g31300.1 | ATP synthase delta chain, mitochondrial precursor, putative, expressed | osa:4343288          | Up          | Oxidative phosphorylation;Metabolic pathways                                                                                                                                                                            |
| 42 | LOC_Os08g01940.1 | non-lysosomal glucosylceramidase, putative, expressed                  | dosa:Os08t0111200-01 | Up and Down | Other glycan degradation;Sphingolipid metabolism;Metabolic pathways                                                                                                                                                     |
| 43 | LOC_Os03g60700.1 | dolichyl-phosphate beta-glycosyltransferase, putative, expressed       | osa:4334604          | Up          | N-Glycan biosynthesis;Metabolic pathways                                                                                                                                                                                |
| 44 | LOC_Os11g47520.1 | glycosyl hydrolase, putative, expressed                                | osa:4351187          | Up          | Metabolic pathways;Amino sugar and nucleotide sugar metabolism                                                                                                                                                          |
| 45 | LOC_Os05g15770.1 | glycosyl hydrolase, putative, expressed                                | osa:4338208          | Up          | Metabolic pathways;Amino sugar and nucleotide sugar metabolism                                                                                                                                                          |
| 46 | LOC_Os11g47560.1 | glycosyl hydrolase, putative, expressed                                | osa:4351191          | Down        | Metabolic pathways;Amino sugar and nucleotide sugar metabolism                                                                                                                                                          |

|    |                  |                                                                                                                           |                      |                   |                                                                                                                                                                                                                                                                  |
|----|------------------|---------------------------------------------------------------------------------------------------------------------------|----------------------|-------------------|------------------------------------------------------------------------------------------------------------------------------------------------------------------------------------------------------------------------------------------------------------------|
| 47 | LOC_Os01g33230.1 | UDP-N-acetylglucosamine--N-acetylmuramyl-pyrophosphoryl-undecaprenol N-acetylglucosamine transferase, putative, expressed | dosa:Os01t0516700-01 | Specific and Down | Metabolic pathways                                                                                                                                                                                                                                               |
| 48 | LOC_Os02g54254.1 | saccharopine dehydrogenase, putative, expressed                                                                           | osa:4330940          | Down              | Lysine degradation;Metabolic pathways;Biosynthesis of secondary metabolites                                                                                                                                                                                      |
| 49 | LOC_Os03g09250.1 | inositol-3-phosphate synthase, putative, expressed                                                                        | osa:4331917          | Down              | Inositol phosphate metabolism;Metabolic pathways                                                                                                                                                                                                                 |
| 50 | LOC_Os02g33710.1 | decarboxylase, putative, expressed                                                                                        | osa:4329593          | Down              | Histidine metabolism;Metabolic pathways;Biosynthesis of secondary metabolites                                                                                                                                                                                    |
| 51 | LOC_Os03g57220.1 | hydroxyacid oxidase 1, putative, expressed                                                                                | dosa:Os03t0786100-01 | Up                | Glyoxylate and dicarboxylate metabolism;Metabolic pathways;Biosynthesis of secondary metabolites;Carbon metabolism;Peroxisome                                                                                                                                    |
| 52 | LOC_Os04g58710.1 | AMP-binding domain containing protein, expressed                                                                          | osa:4337447          | Down              | Glyoxylate and dicarboxylate metabolism;Metabolic pathways                                                                                                                                                                                                       |
| 53 | LOC_Os01g67960.1 | GPI transamidase component PIG-S-related, putative, expressed                                                             | osa:4324979          | Up                | Glycosylphosphatidylinositol (GPI)-anchor biosynthesis;Metabolic pathways                                                                                                                                                                                        |
| 54 | LOC_Os04g33190.1 | AMP-binding enzyme, putative, expressed                                                                                   | osa:4335745          | Down              | Glycolysis / Gluconeogenesis;Pyruvate metabolism;Propanoate metabolism;Metabolic pathways;Biosynthesis of secondary metabolites;Carbon metabolism;Glyoxylate and dicarboxylate metabolism                                                                        |
| 55 | LOC_Os02g51590.1 | phosphoglycerate mutase, putative, expressed                                                                              | osa:4330747          | Up                | Glycolysis / Gluconeogenesis;Glycine, serine and threonine metabolism;Metabolic pathways;Biosynthesis of secondary metabolites;Carbon metabolism;Biosynthesis of amino acids                                                                                     |
| 56 | LOC_Os04g38540.1 | aldose 1-epimerase, putative, expressed                                                                                   | osa:4336039          | Specific          | Glycolysis / Gluconeogenesis;Galactose metabolism;Metabolic pathways;Biosynthesis of secondary metabolites                                                                                                                                                       |
| 57 | LOC_Os11g10480.1 | dehydrogenase, putative, expressed                                                                                        | osa:4350053          | Down              | Glycolysis / Gluconeogenesis;Fatty acid degradation;Tyrosine metabolism;alpha-Linolenic acid metabolism;Metabolic pathways;Biosynthesis of secondary metabolites                                                                                                 |
| 58 | LOC_Os04g20164.2 | amine oxidase precursor, putative, expressed                                                                              | dosa:Os04t0269600-01 | Up                | Glycine, serine and threonine metabolism;Tyrosine metabolism;Phenylalanine metabolism;beta-Alanine metabolism;Isoquinoline alkaloid biosynthesis;Tropane, piperidine and pyridine alkaloid biosynthesis;Metabolic pathways;Biosynthesis of secondary metabolites |
| 59 | LOC_Os09g26700.1 | choline/ethanolamine kinase, putative, expressed                                                                          | osa:4347160          | Down              | Glycerophospholipid metabolism;Metabolic pathways                                                                                                                                                                                                                |

|    |                        |                                                                          |                      |             |                                                                                                                                                                                                                                                          |
|----|------------------------|--------------------------------------------------------------------------|----------------------|-------------|----------------------------------------------------------------------------------------------------------------------------------------------------------------------------------------------------------------------------------------------------------|
| 60 | LOC_Os03g27370.1       | phospholipase D, putative, expressed                                     | obr:102711051        | Down        | Glycerophospholipid metabolism;Ether lipid metabolism;Metabolic pathways;Biosynthesis of secondary metabolites;Endocytosis                                                                                                                               |
| 61 | LOC_Os03g50030.1       | phospholipase A2, putative, expressed                                    | osa:4333862          | Specific    | Glycerophospholipid metabolism;Ether lipid metabolism;Arachidonic acid metabolism;alpha-Linolenic acid metabolism;Metabolic pathways;Biosynthesis of secondary metabolites                                                                               |
| 62 | LOC_Os01g49820.1       | lipid phosphatase protein, putative, expressed                           | osa:4325649          | Down        | Glycerolipid metabolism;Glycerophospholipid metabolism;Biosynthesis of secondary metabolites                                                                                                                                                             |
| 63 | LOC_Os03g17480.1       | IN2-1 protein, putative, expressed                                       | osa:4332456          | Up and Down | Glutathione metabolism;Metabolic pathways                                                                                                                                                                                                                |
| 64 | LOC_Os07g28480.1       | glutathione S-transferase, putative, expressed                           | osa:4343183          | Up          | Glutathione metabolism;Metabolic pathways                                                                                                                                                                                                                |
| 65 | LOC_Os10g38670.1       | glutathione S-transferase, putative, expressed                           | dosa:Os10t0530200-01 | Up          | Glutathione metabolism;Metabolic pathways                                                                                                                                                                                                                |
| 66 | LOC_Os10g38489.1       | glutathione S-transferase GSTU6, putative, expressed                     | dosa:Os10t0528400-01 | Up          | Glutathione metabolism;Metabolic pathways                                                                                                                                                                                                                |
| 67 | LOC_Os10g38350.1       | glutathione S-transferase, putative, expressed                           | osa:4349185          | Up          | Glutathione metabolism;Metabolic pathways                                                                                                                                                                                                                |
| 68 | LOC_Os10g38730.1       | glutathione S-transferase, putative, expressed                           | obr:102711734        | Up          | Glutathione metabolism;Metabolic pathways                                                                                                                                                                                                                |
| 69 | LOC_Os03g39850.1 (GST) | glutathione S-transferase, putative, expressed                           | osa:4333371          | Down        | Glutathione metabolism;Metabolic pathways                                                                                                                                                                                                                |
| 70 | LOC_Os04g56930.1       | glycosyl hydrolases, putative, expressed                                 | osa:4337313          | Down        | Galactose metabolism;Starch and sucrose metabolism;Metabolic pathways                                                                                                                                                                                    |
| 71 | LOC_Os05g51670.1       | NAD dependent epimerase/dehydratase family protein, putative, expressed  | osa:4339812          | Down        | Galactose metabolism;Amino sugar and nucleotide sugar metabolism;Metabolic pathways                                                                                                                                                                      |
| 72 | LOC_Os06g03910.1       | hydrolase, NUDIX family, domain containing protein, expressed            | osa:4339996          | Down        | Fructose and mannose metabolism;Purine metabolism;Starch and sucrose metabolism;Metabolic pathways;Biosynthesis of secondary metabolites                                                                                                                 |
| 73 | LOC_Os04g20280.2       | expressed protein                                                        | osa:4335343          | Specific    | Fatty acid elongation;Biosynthesis of unsaturated fatty acids;Biosynthesis of secondary metabolites;Fatty acid metabolism;Metabolic pathways                                                                                                             |
| 74 | LOC_Os01g06600.1 (ACX) | glutaryl-CoA dehydrogenase, mitochondrial precursor, putative, expressed | osa:4324062          | Down        | Fatty acid degradation;alpha-Linolenic acid metabolism;Biosynthesis of unsaturated fatty acids;Metabolic pathways;Biosynthesis of secondary metabolites;Fatty acid metabolism;Peroxisome;Carbon metabolism;beta-Alanine metabolism;Propanoate metabolism |
| 75 | LOC_Os07g07450.1       | versicolorin reductase, putative, expressed                              | osa:9270991          | Up          | Fatty acid biosynthesis;Biotin metabolism;Metabolic pathways;Fatty acid metabolism                                                                                                                                                                       |

|    |                  |                                                                         |             |          |                                                                                                                                                                                                          |
|----|------------------|-------------------------------------------------------------------------|-------------|----------|----------------------------------------------------------------------------------------------------------------------------------------------------------------------------------------------------------|
| 76 | LOC_Os04g09900.1 | ent-kaurene synthase, chloroplast precursor, putative, expressed        | osa:4335090 | Up       | Diterpenoid biosynthesis;Biosynthesis of secondary metabolites                                                                                                                                           |
| 77 | LOC_Os01g22010.4 | S-adenosylmethionine synthetase, putative, expressed                    | osa:4326996 | Down     | Cysteine and methionine metabolism;Metabolic pathways;Biosynthesis of secondary metabolites;Biosynthesis of amino acids                                                                                  |
| 78 | LOC_Os05g04510.1 | S-adenosylmethionine synthetase, putative, expressed                    | osa:4337733 | Down     | Cysteine and methionine metabolism;Metabolic pathways;Biosynthesis of secondary metabolites;Biosynthesis of amino acids                                                                                  |
| 79 | LOC_Os12g41390.1 | homocysteine S-methyltransferase protein, putative, expressed           | osa:4352747 | Up       | Cysteine and methionine metabolism;Metabolic pathways;Biosynthesis of secondary metabolites                                                                                                              |
| 80 | LOC_Os11g08380.1 | 1-aminocyclopropane-1-carboxylate oxidase, putative, expressed          | osa:4349970 | Up       | Cysteine and methionine metabolism;Metabolic pathways;Biosynthesis of secondary metabolites                                                                                                              |
| 81 | LOC_Os05g05680.1 | 1-aminocyclopropane-1-carboxylate oxidase, putative, expressed          | osa:4337818 | Down     | Cysteine and methionine metabolism;Metabolic pathways;Biosynthesis of secondary metabolites                                                                                                              |
| 82 | LOC_Os10g17650.1 | Os10bglu34 - beta-glucosidase homologue, similar to Os3bglu6, expressed | osa:4348315 | Down     | Cyanoamino acid metabolism;Starch and sucrose metabolism;Phenylpropanoid biosynthesis;Metabolic pathways;Biosynthesis of secondary metabolites                                                           |
| 83 | LOC_Os11g33240.1 | citrate synthase, putative, expressed                                   | osa:4350660 | Specific | Citrate cycle (TCA cycle);Glyoxylate and dicarboxylate metabolism;Metabolic pathways;Biosynthesis of secondary metabolites;Carbon metabolism;2-Oxocarboxylic acid metabolism;Biosynthesis of amino acids |
| 84 | LOC_Os02g47020.1 | phosphoribulokinase/Uridine kinase family protein, expressed            | osa:4330413 | Specific | Carbon fixation in photosynthetic organisms;Metabolic pathways;Carbon metabolism                                                                                                                         |
| 85 | LOC_Os04g16680.1 | fructose-1,6-bisphosphatase, putative, expressed                        | osa:4335227 | Down     | Carbon fixation in photosynthetic organisms;Metabolic pathways;Carbon metabolism                                                                                                                         |
| 86 | LOC_Os02g48560.1 | fatty acid desaturase, putative, expressed                              | osa:4330523 | Down     | Biosynthesis of unsaturated fatty acids;Fatty acid metabolism;Metabolic pathways                                                                                                                         |
| 87 | LOC_Os09g23070.1 | malonyl-CoA decarboxylase, mitochondrial precursor, putative, expressed | osa:4346967 | Down     | beta-Alanine metabolism;Propanoate metabolism;Metabolic pathways;Peroxisome                                                                                                                              |
| 88 | LOC_Os12g29760.1 | oxidoreductase, aldo/keto reductase family protein, putative, expressed | osa:4352223 | Down     | Ascorbate and aldarate metabolism;Metabolic pathways;Biosynthesis of secondary metabolites                                                                                                               |
| 89 | LOC_Os06g37080.1 | L-ascorbate oxidase precursor, putative, expressed                      | osa:4341335 | Down     | Ascorbate and aldarate metabolism;Metabolic pathways                                                                                                                                                     |

|     |                         |                                                                                 |                      |          |                                                                                                                                                                                                                    |
|-----|-------------------------|---------------------------------------------------------------------------------|----------------------|----------|--------------------------------------------------------------------------------------------------------------------------------------------------------------------------------------------------------------------|
| 90  | LOC_Os03g08530.1        | aminotransferase, classes I and II, domain containing protein, expressed        | dosa:Os03t0183600-00 | Down     | Arginine biosynthesis;Alanine, aspartate and glutamate metabolism;Carbon fixation in photosynthetic organisms;Metabolic pathways;Carbon metabolism;2-Oxocarboxylic acid metabolism;Biosynthesis of amino acids     |
| 91  | LOC_Os04g01690.1        | pyridoxal-dependent decarboxylase protein, putative, expressed                  | osa:4334917          | Up       | Arginine and proline metabolism;Metabolic pathways                                                                                                                                                                 |
| 92  | LOC_Os07g04690.1        | UDP-arabinose 4-epimerase 1, putative, expressed                                | osa:4342364          | Down     | Amino sugar and nucleotide sugar metabolism;Metabolic pathways                                                                                                                                                     |
| 93  | LOC_Os01g62020.1        | NAD dependent epimerase/dehydratase family domain containing protein, expressed | osa:4327367          | Down     | Amino sugar and nucleotide sugar metabolism;Metabolic pathways                                                                                                                                                     |
| 94  | LOC_Os12g03470.1        | alpha-N-arabinofuranosidase A, putative, expressed                              | osa:4351401          | Down     | Amino sugar and nucleotide sugar metabolism;Metabolic pathways                                                                                                                                                     |
| 95  | LOC_Os06g11240.1        | 12-oxophytodienoate reductase, putative, expressed                              | osa:4340486          | Specific | alpha-Linolenic acid metabolism;Metabolic pathways;Biosynthesis of secondary metabolites                                                                                                                           |
| 96  | LOC_Os03g04000.1        | AMP-binding domain containing protein, expressed                                | osa:4331515          | Up       | alpha-Linolenic acid metabolism;Metabolic pathways;Biosynthesis of secondary metabolites                                                                                                                           |
| 97  | LOC_Os02g12690.1        | cytochrome P450, putative, expressed                                            | osa:4328743          | Up       | alpha-Linolenic acid metabolism;Metabolic pathways;Biosynthesis of secondary metabolites                                                                                                                           |
| 98  | LOC_Os08g39300.1        | aminotransferase, putative, expressed                                           | osa:4345962          | Down     | Alanine, aspartate and glutamate metabolism;Glycine, serine and threonine metabolism;Glyoxylate and dicarboxylate metabolism;Metabolic pathways;Biosynthesis of secondary metabolites;Carbon metabolism;Peroxisome |
| 99  | LOC_Os08g36320.3        | decarboxylase, putative, expressed                                              | dosa:Os08t0465800-01 | Up       | Alanine, aspartate and glutamate metabolism;beta-Alanine metabolism;Taurine and hypotaurine metabolism;Butanoate metabolism;Metabolic pathways;Biosynthesis of secondary metabolites                               |
| 100 | LOC_Os08g35860.1        | cytokinin dehydrogenase precursor, putative, expressed                          | osa:4345764          | Down     | Zeatin biosynthesis                                                                                                                                                                                                |
| 101 | LOC_Os03g57790.1        | ubiquitin-conjugating enzyme, putative, expressed                               | osa:4334386          | Down     | Ubiquitin mediated proteolysis                                                                                                                                                                                     |
| 102 | LOC_Os03g04520.2        | RNA recognition motif containing protein, putative, expressed                   | osa:4331556          | Specific | Spliceosome                                                                                                                                                                                                        |
| 103 | LOC_Os08g29650.1        | RNA recognition motif containing protein, expressed                             | osa:4345455          | Up       | Spliceosome                                                                                                                                                                                                        |
| 104 | LOC_Os07g47630.1        | RNA recognition motif containing protein, expressed                             | dosa:Os07t0673500-01 | Up       | Spliceosome                                                                                                                                                                                                        |
| 105 | LOC_Os10g06540.1 (VAMP) | vesicle-associated membrane protein, putative, expressed                        | osa:4348130          | Down     | SNARE interactions in vesicular transport                                                                                                                                                                          |
| 106 | LOC_Os03g05020.1        | PIR, putative, expressed                                                        | osa:4331593          | Down     | RNA transport                                                                                                                                                                                                      |
| 107 | LOC_Os10g40040.1        | expressed protein                                                               | osa:4349298          | Specific | RNA degradation                                                                                                                                                                                                    |



|     |                         |                                                                                                |                      |             |                                                                                             |
|-----|-------------------------|------------------------------------------------------------------------------------------------|----------------------|-------------|---------------------------------------------------------------------------------------------|
| 108 | LOC_Os11g43890.1        | WD domain, G-beta repeat domain containing protein, expressed                                  | osa:4351059          | Up          | RNA degradation                                                                             |
| 109 | LOC_Os01g56190.1        | HVT1, putative, expressed                                                                      | dosa:Os01t0767700-01 | Down        | RNA degradation                                                                             |
| 110 | LOC_Os10g42320.1        | nonsense-mediated mRNA decay protein 3, putative, expressed                                    | osa:4349477          | Down        | Ribosome biogenesis in eukaryotes;RNA transport                                             |
| 111 | LOC_Os03g20100.1        | S1 RNA binding domain containing protein, expressed                                            | osa:4332652          | Specific    | Ribosome                                                                                    |
| 112 | LOC_Os02g10540.1        | ribosomal protein L7/L12 C-terminal domain containing protein, expressed                       | osa:4328635          | Up          | Ribosome                                                                                    |
| 113 | LOC_Os03g40180.1        | 60S ribosomal protein L15, putative, expressed                                                 | osa:9266562          | Down        | Ribosome                                                                                    |
| 114 | LOC_Os01g54870.1        | 60S ribosomal protein L18a, putative, expressed                                                | osa:4327004          | Down        | Ribosome                                                                                    |
| 115 | LOC_Os07g43310.1        | ribosomal protein L7/L12 C-terminal domain containing protein, expressed                       | bdi:100837964        | Down        | Ribosome                                                                                    |
| 116 | LOC_Os07g14270.1        | calreticulin precursor protein, putative, expressed                                            | osa:4342826          | Up          | Protein processing in endoplasmic reticulum;Phagosome                                       |
| 117 | LOC_Os04g36750.1        | hsp20/alpha crystallin family protein, putative, expressed                                     | osa:4335956          | Down        | Protein processing in endoplasmic reticulum                                                 |
| 118 | LOC_Os01g04330.1        | OsCML16 - Calmodulin-related calcium sensor protein, expressed                                 | osa:4325693          | Up          | Plant-pathogen interaction                                                                  |
| 119 | LOC_Os02g46090.1 (CDPK) | CAMK_CAMK_like.15 - CAMK includes calcium/calmodulin depeudent protein kinases, expressed      | osa:4330351          | Down        | Plant-pathogen interaction                                                                  |
| 120 | LOC_Os04g47300.1        | CAMK_CAMK_like.26 - CAMK includes calcium/calmodulin depeudent protein kinases, expressed      | osa:4336653          | Down        | Plant-pathogen interaction                                                                  |
| 121 | LOC_Os11g11960.1 (RPM1) | disease resistance protein RPM1, putative, expressed                                           | osa:9267892          | Down        | Plant-pathogen interaction                                                                  |
| 122 | LOC_Os09g39400.1        | histidine-containing phosphotransfer protein, putative, expressed                              | osa:4347886          | Specific    | Plant hormone signal transduction                                                           |
| 123 | LOC_Os03g50860.1        | histidine kinase, putative, expressed                                                          | osa:4333916          | Specific    | Plant hormone signal transduction                                                           |
| 124 | LOC_Os01g56200.1        | BTBA2 - Bric-a-Brac, Tramtrack, Broad Complex BTB domain with Ankyrin repeat region, expressed | osa:4325503          | Specific    | Plant hormone signal transduction                                                           |
| 125 | LOC_Os11g05480.1        | transcription factor, putative, expressed                                                      | osa:4349800          | Up          | Plant hormone signal transduction                                                           |
| 126 | LOC_Os01g59150.2        | tubulin/FtsZ domain containing protein, putative, expressed                                    | osa:4327550          | Up          | Phagosome                                                                                   |
| 127 | LOC_Os03g01530.1        | tubulin/FtsZ domain containing protein, putative, expressed                                    | osa:4331315          | Up          | Phagosome                                                                                   |
| 128 | LOC_Os01g18050.1        | tubulin/FtsZ domain containing protein, putative, expressed                                    | osa:4326917          | Up          | Phagosome                                                                                   |
| 129 | LOC_Os09g14510.1 (PEX3) | peroxin-3 family protein, putative, expressed                                                  | osa:4346691          | Down        | Peroxisome                                                                                  |
| 130 | LOC_Os05g02310.1        | soluble inorganic pyrophosphatase, putative, expressed                                         | osa:4337608          | Up          | Oxidative phosphorylation                                                                   |
| 131 | LOC_Os04g48750.1        | 3-oxo-5-alpha-steroid 4-dehydrogenase, putative, expressed                                     | osa:4336740          | Down        | N-Glycan biosynthesis                                                                       |
| 132 | LOC_Os12g38380.1        | tetratricopeptide repeat containing protein, putative, expressed                               | dosa:Os12t0571900-01 | Specific    | mRNA surveillance pathway                                                                   |
| 133 | LOC_Os04g18010.2        | cleavage and polyadenylation specificity factor subunit 1, putative, expressed                 | osa:9266269          | Up          | mRNA surveillance pathway                                                                   |
| 134 | LOC_Os09g29980.1        | transposon protein, putative, CACTA, En/Spm sub-class, expressed                               | osa:4347363          | Up          | mRNA surveillance pathway                                                                   |
| 135 | LOC_Os08g21350.2        | cig3, putative, expressed                                                                      | osa:4345227          | Down        | mRNA surveillance pathway                                                                   |
| 136 | LOC_Os07g14070.1        | SCP-like extracellular protein, expressed                                                      | dosa:Os07t0243800-00 | Up and Down | MAPK signaling pathway - plant;Plant hormone signal transduction;Plant-pathogen interaction |

|     |                       |                                                                                          |                       |                   |                                                                                             |
|-----|-----------------------|------------------------------------------------------------------------------------------|-----------------------|-------------------|---------------------------------------------------------------------------------------------|
| 137 | LOC_Os07g03730.1      | SCP-like extracellular protein, expressed                                                | osa:4342318           | Down              | MAPK signaling pathway - plant;Plant hormone signal transduction;Plant-pathogen interaction |
| 138 | LOC_Os03g49260.1      | lipoxygenase, putative, expressed                                                        | osa:4333818           | Down              | Linoleic acid metabolism                                                                    |
| 139 | LOC_Os03g40670.1      | glycerophosphoryl diester phosphodiesterase family protein, putative, expressed          | osa:4333407           | Up                | Glycerophospholipid metabolism                                                              |
| 140 | LOC_Os02g31030.2      | glycerophosphoryl diester phosphodiesterase family protein, putative, expressed          | osa:4329468           | Up                | Glycerophospholipid metabolism                                                              |
| 141 | LOC_Os05g15530.1 (AT) | aminotransferase domain containing protein, putative, expressed                          | osa:4338203           | Down              | Folate biosynthesis                                                                         |
| 142 | LOC_Os03g25150.1      | transposon protein, putative, unclassified, expressed                                    | bdi:100842616         | Up                | Flavone and flavonol biosynthesis                                                           |
| 143 | LOC_Os09g32760.1      | acyl-ACP thioesterase, putative, expressed                                               | osa:4347505           | Up                | Fatty acid biosynthesis                                                                     |
| 144 | LOC_Os04g51120.1      | ENTH domain containing protein, expressed                                                | osa:4336871           | Down              | Endocytosis                                                                                 |
| 145 | LOC_Os01g46580.1      | actin-related protein 2/3 complex subunit 2, putative, expressed                         | osa:4324174           | Down              | Endocytosis                                                                                 |
| 146 | LOC_Os02g58640.1      | tumor susceptibility gene 101, putative, expressed                                       | osa:4331267           | Down              | Endocytosis                                                                                 |
| 147 | LOC_Os02g58220.1      | RPA2A - Putative single-stranded DNA binding complex subunit 2, expressed                | osa:4331236           | Specific          | DNA replication;Nucleotide excision repair;Mismatch repair;Homologous recombination         |
| 148 | LOC_Os12g07720.1      | RFC4 - Putative clamp loader of PCNA, replication factor C subunit 4, expressed          | osa:4351654           | Specific          | DNA replication;Nucleotide excision repair;Mismatch repair                                  |
| 149 | LOC_Os03g51030.1      | phytochrome A, putative, expressed                                                       | osa:4333930           | Down              | Circadian rhythm - plant                                                                    |
| 150 | LOC_Os01g58680.1      | apurinic endonuclease-redox protein, putative, expressed                                 | osa:4327960           | Down              | Base excision repair                                                                        |
| 151 | LOC_Os04g42990.1      | suppressor of stem-loop protein 1, putative, expressed                                   | dosa:Os04t05089 00-00 | Specific          | Basal transcription factors;Nucleotide excision repair                                      |
| 152 | LOC_Os03g10070.1      | transcription initiation factor IIB, putative, expressed                                 | osa:4331943           | Down              | Basal transcription factors                                                                 |
| 153 | LOC_Os08g09240.2      | autophagy-related protein, putative, expressed                                           | osa:4344857           | Down              | Autophagy - other                                                                           |
| 154 | LOC_Os01g54020.1      | tRNA synthetase, putative, expressed                                                     | osa:4326551           | Up                | Aminoacyl-tRNA biosynthesis                                                                 |
| 155 | LOC_Os01g72740.1      | cytochrome P450, putative, expressed                                                     | obr:102718882         | Up                | -                                                                                           |
| 156 | LOC_Os02g11030.1      | 50S ribosomal protein L19, chloroplast precursor, putative, expressed                    | obr:102713795         | Specific          | -                                                                                           |
| 157 | LOC_Os03g57450.1      | CAMK_CAMK_like.2 - CAMK includes calcium/calmodulin dependent protein kinases, expressed | dosa:Os03t07885 00-01 | Up                | -                                                                                           |
| 158 | LOC_Os06g08080.1      | inorganic H+ pyrophosphatase, putative, expressed                                        | osa:4340298           | Up                | -                                                                                           |
| 159 | LOC_Os05g11950.1      | GDSL-like lipase/acylhydrolase, putative, expressed                                      | dosa:Os05t02101 00-01 | Specific and Down | -                                                                                           |
| 160 | LOC_Os05g43100.1      | GDSL-like lipase/acylhydrolase, putative, expressed                                      | obr:102720987         | Up and Down       | -                                                                                           |
| 161 | LOC_Os03g25030.1      | GDSL-like lipase/acylhydrolase, putative, expressed                                      | dosa:Os03t03658 00-01 | Up and Down       | -                                                                                           |
| 162 | LOC_Os05g43120.1      | GDSL-like lipase/acylhydrolase, putative, expressed                                      | obr:102720987         | Up                | -                                                                                           |
| 163 | LOC_Os01g12320.1      | GDSL-like lipase/acylhydrolase, putative, expressed                                      | sita:101772224        | Up                | -                                                                                           |
| 164 | LOC_Os12g16200.1      | glutathione synthetase, chloroplast precursor, putative, expressed                       | obr:102718696         | Up                | -                                                                                           |
| 165 | LOC_Os01g08090.1      | flavonol-3-O-glycoside-7-O-glucosyltransferase 1, putative, expressed                    | dosa:Os01t01760 00-01 | Up                | -                                                                                           |

|     |                  |                                                                                       |                          |                      |   |
|-----|------------------|---------------------------------------------------------------------------------------|--------------------------|----------------------|---|
| 166 | LOC_Os02g09240.1 | cytochrome P450 71D8, putative, expressed                                             | dosa:Os02t01852<br>00-01 | Down                 | - |
| 167 | LOC_Os03g19350.1 | OsLonP1 - Putative Lon protease homologue, expressed                                  | osa:4332601              | Specific and<br>Down | - |
| 168 | LOC_Os02g52610.1 | xyloglucan fucosyltransferase, putative, expressed                                    | dosa:Os02t07639<br>00-01 | Specific and<br>Down | - |
| 169 | LOC_Os03g01730.1 | expressed protein                                                                     | dosa:Os04t01193<br>00-00 | Specific             | - |
| 170 | LOC_Os03g32526.1 | tRNA-splicing endonuclease positive effector-related, putative, expressed             | osa:4333212              | Specific             | - |
| 171 | LOC_Os05g23940.1 | transcription initiation factor IIB, putative, expressed                              | osa:4338362              | Specific             | - |
| 172 | LOC_Os01g22390.2 | WD domain containing protein, putative, expressed                                     | osa:4326972              | Specific             | - |
| 173 | LOC_Os04g33450.1 | expressed protein                                                                     | osa:4335760              | Specific             | - |
| 174 | LOC_Os06g36490.1 | ethylene-responsive element-binding protein, putative, expressed                      | osa:4341303              | Specific             | - |
| 175 | LOC_Os05g36070.1 | signal peptide peptidase domain containing protein, expressed                         | osa:4338901              | Specific             | - |
| 176 | LOC_Os01g48900.1 | dynamamin-related protein 1A, putative, expressed                                     | osa:9269791              | Specific             | - |
| 177 | LOC_Os07g35750.1 | TKL_IRAK_DUF26-ld.3 - DUF26 kinases have homology to DUF26 containing loci, expressed | osa:4343505              | Specific             | - |
| 178 | LOC_Os07g46920.1 | sex determination protein tasselseed-2, putative, expressed                           | osa:4344204              | Specific             | - |
| 179 | LOC_Os02g30620.2 | dnaJ domain containing protein, expressed                                             | osa:4329448              | Specific             | - |
| 180 | LOC_Os01g20160.1 | OsHKT1;5 - Na <sup>+</sup> transporter, expressed                                     | osa:4327757              | Specific             | - |
| 181 | LOC_Os03g27820.1 | expressed protein                                                                     | osa:4333036              | Specific             | - |
| 182 | LOC_Os09g25720.1 | glycine-rich cell wall structural protein 2 precursor, putative, expressed            | dosa:Os09t04255<br>00-01 | Specific             | - |
| 183 | LOC_Os04g45190.3 | MSP domain containing protein, expressed                                              | dosa:Os04t05344<br>00-01 | Specific             | - |
| 184 | LOC_Os10g41560.1 | expressed protein                                                                     | osa:4349418              | Specific             | - |
| 185 | LOC_Os04g33240.1 | sex determination protein tasselseed-2, putative, expressed                           | osa:4335749              | Specific             | - |
| 186 | LOC_Os04g21710.1 | expressed protein                                                                     | osa:4335381              | Specific             | - |
| 187 | LOC_Os03g58960.1 | DHHC zinc finger domain containing protein, expressed                                 | osa:4334485              | Specific             | - |
| 188 | LOC_Os08g16830.1 | retrotransposon protein, putative, SINE subclass, expressed                           | osa:4345134              | Specific             | - |
| 189 | LOC_Os07g48410.1 | RNA-binding zinc finger protein, putative, expressed                                  | osa:4344312              | Specific             | - |
| 190 | LOC_Os09g04240.1 | retrotransposon protein, putative, unclassified, expressed                            | pda:103699490            | Specific             | - |
| 191 | LOC_Os08g03440.1 | actin, putative, expressed                                                            | osa:4344577              | Specific             | - |
| 192 | LOC_Os02g54500.1 | WD40-like, putative, expressed                                                        | dosa:Os02t07860<br>00-01 | Specific             | - |
| 193 | LOC_Os02g39140.1 | helix-loop-helix DNA-binding domain containing protein, expressed                     | osa:4329910              | Specific             | - |
| 194 | LOC_Os12g10200.1 | SAM-dependent methyltransferase, putative, expressed                                  | dosa:Os12t02031<br>00-01 | Specific             | - |
| 195 | LOC_Os03g21830.1 | appr-1-p processing enzyme family protein, putative, expressed                        | osa:4332764              | Specific             | - |
| 196 | LOC_Os05g38270.1 | regulator of chromosome condensation, putative, expressed                             | osa:107275700            | Specific             | - |

|     |                  |                                                                                                                                   |                      |          |   |
|-----|------------------|-----------------------------------------------------------------------------------------------------------------------------------|----------------------|----------|---|
| 197 | LOC_Os03g43990.1 | BTBN8 - Bric-a-Brac, Tramtrack, Broad Complex BTB domain with non-phototropic hypocotyl 3 NPH3 and coiled-coil domains, expressed | osa:107280491        | Specific | - |
| 198 | LOC_Os01g71340.1 | glycosyl hydrolases family 17, putative, expressed                                                                                | osa:4326518          | Specific | - |
| 199 | LOC_Os10g42870.1 | peptide transporter PTR2, putative, expressed                                                                                     | osa:4349516          | Specific | - |
| 200 | LOC_Os08g01920.1 | SGR2, putative, expressed                                                                                                         | osa:4344482          | Specific | - |
| 201 | LOC_Os03g04130.1 | AMP-binding domain containing protein, expressed                                                                                  | osa:4331525          | Specific | - |
| 202 | LOC_Os04g50120.1 | zinc-binding protein, putative, expressed                                                                                         | osa:4336825          | Specific | - |
| 203 | LOC_Os09g02130.1 | expressed protein                                                                                                                 | osa:4346382          | Specific | - |
| 204 | LOC_Os01g57690.1 | early nodulin 20 precursor, putative, expressed                                                                                   | osa:4327048          | Specific | - |
| 205 | LOC_Os02g25700.1 | O-acyltransferase, putative, expressed                                                                                            | osa:4329278          | Specific | - |
| 206 | LOC_Os10g39640.1 | expansin precursor, putative, expressed                                                                                           | osa:4349265          | Specific | - |
| 207 | LOC_Os02g04450.1 | plant-specific domain TIGR01589 family protein, putative, expressed                                                               | osa:4328235          | Specific | - |
| 208 | LOC_Os02g13560.1 | transporter family protein, putative, expressed                                                                                   | osa:4328798          | Specific | - |
| 209 | LOC_Os08g03690.1 | LTPL24 - Protease inhibitor/seed storage/LTP family protein precursor, expressed                                                  | osa:4344595          | Specific | - |
| 210 | LOC_Os11g43600.1 | peptide chain release factor protein, putative, expressed                                                                         | osa:4351050          | Specific | - |
| 211 | LOC_Os12g35630.1 | elongation factor TS family protein, expressed                                                                                    | osa:4352441          | Specific | - |
| 212 | LOC_Os07g13360.1 | expressed protein                                                                                                                 | -                    | Specific | - |
| 213 | LOC_Os12g29560.1 | DHHC zinc finger domain containing protein, expressed                                                                             | osa:4352214          | Specific | - |
| 214 | LOC_Os12g06210.1 | harpin-induced protein 1 domain containing protein, expressed                                                                     | osa:4351556          | Specific | - |
| 215 | LOC_Os07g27810.1 | fiber protein Fb34, putative, expressed                                                                                           | osa:4343166          | Specific | - |
| 216 | LOC_Os08g43010.1 | disease resistance RPP13-like protein 1, putative, expressed                                                                      | osa:4346203          | Specific | - |
| 217 | LOC_Os01g51640.1 | expressed protein                                                                                                                 | osa:4325943          | Specific | - |
| 218 | LOC_Os11g04460.1 | calcium-transporting ATPase, plasma membrane-type, putative, expressed                                                            | osa:4349735          | Specific | - |
| 219 | LOC_Os06g08280.1 | protein kinase domain containing protein, expressed                                                                               | osa:4340309          | Specific | - |
| 220 | LOC_Os03g22140.1 | tetratricopeptide repeat domain containing protein, expressed                                                                     | osa:4332790          | Specific | - |
| 221 | LOC_Os01g49120.1 | MATE efflux family protein, putative, expressed                                                                                   | dosa:Os01t0684900-01 | Specific | - |
| 222 | LOC_Os01g42234.2 | amino acid permease family protein, putative, expressed                                                                           | osa:4324220          | Specific | - |
| 223 | LOC_Os05g05930.1 | peripheral-type benzodiazepine receptor, putative, expressed                                                                      | osa:9271175          | Specific | - |
| 224 | LOC_Os08g41500.1 | ubiquitin-associated protein, putative, expressed                                                                                 | osa:4346099          | Specific | - |
| 225 | LOC_Os03g11010.1 | natural resistance-associated macrophage protein, putative, expressed                                                             | osa:4332012          | Specific | - |
| 226 | LOC_Os11g37940.1 | WIP2 - Wound-induced protein precursor, expressed                                                                                 | osa:4350820          | Specific | - |
| 227 | LOC_Os01g58620.1 | expressed protein                                                                                                                 | osa:4327955          | Specific | - |
| 228 | LOC_Os10g25870.1 | dirigent, putative, expressed                                                                                                     | osa:4348558          | Specific | - |

|     |                  |                                                                                                               |                      |             |   |
|-----|------------------|---------------------------------------------------------------------------------------------------------------|----------------------|-------------|---|
| 229 | LOC_Os02g09780.1 | phytoene dehydrogenase-like, putative, expressed                                                              | osa:4328575          | Specific    | - |
| 230 | LOC_Os02g58110.1 | expressed protein                                                                                             | dosa:Os02t0827500-01 | Specific    | - |
| 231 | LOC_Os11g45990.1 | von Willebrand factor type A domain containing protein, putative, expressed                                   | osa:4351146          | Specific    | - |
| 232 | LOC_Os02g58030.1 | leucine-rich repeat-containing protein 40, putative, expressed                                                | osa:4331218          | Specific    | - |
| 233 | LOC_Os03g04380.1 | LYR motif containing protein, putative, expressed                                                             | osa:4331544          | Specific    | - |
| 234 | LOC_Os05g01360.1 | expressed protein                                                                                             | osa:4337547          | Specific    | - |
| 235 | LOC_Os08g01710.1 | GLTP domain containing protein, putative, expressed                                                           | dosa:Os08t0108700-00 | Specific    | - |
| 236 | LOC_Os03g44670.1 | expressed protein                                                                                             | osa:4333583          | Specific    | - |
| 237 | LOC_Os05g51630.2 | early-responsive to dehydration protein-related, putative, expressed                                          | osa:4339808          | Specific    | - |
| 238 | LOC_Os10g35490.1 | hydrolase, alpha/beta fold family domain containing protein, expressed                                        | dosa:Os10t0498000-01 | Specific    | - |
| 239 | LOC_Os01g33420.1 | glycosyl hydrolase family protein 27, putative, expressed                                                     | osa:4323975          | Specific    | - |
| 240 | LOC_Os02g54980.1 | pheophorbide a oxygenase, chloroplast precursor, putative, expressed                                          | osa:4330982          | Specific    | - |
| 241 | LOC_Os02g58080.1 | transporter, major facilitator family, putative, expressed                                                    | osa:4331221          | Specific    | - |
| 242 | LOC_Os08g28790.1 | dirigent, putative, expressed                                                                                 | osa:4345418          | Specific    | - |
| 243 | LOC_Os06g23350.1 | late embryogenesis abundant protein D-34, putative, expressed                                                 | osa:4340952          | Specific    | - |
| 244 | LOC_Os11g04020.1 | major facilitator superfamily antiporter, putative, expressed                                                 | osa:4349704          | Specific    | - |
| 245 | LOC_Os03g61810.1 | tRNA-specific adenosine deaminase, putative, expressed                                                        | osa:4334690          | Specific    | - |
| 246 | LOC_Os03g16850.1 | dof zinc finger domain containing protein, putative, expressed                                                | osa:107280245        | Specific    | - |
| 247 | LOC_Os12g36240.1 | inhibitor I family protein, putative, expressed                                                               | dosa:Os12t0548700-01 | Specific    | - |
| 248 | LOC_Os01g37770.1 | RWD domain containing protein, expressed                                                                      | osa:4324673          | Specific    | - |
| 249 | LOC_Os03g57854.1 | MBTB3 - Bric-a-Brac, Tramtrack, Broad Complex BTB domain with Meprin and TRAF Homology MATH domain, expressed | osa:4334388          | Specific    | - |
| 250 | LOC_Os11g11100.1 | bZIP transcription factor domain containing protein, expressed                                                | osa:4350088          | Specific    | - |
| 251 | LOC_Os01g49510.1 | OsPOP3 - Putative Prolyl Oligopeptidase homologue, expressed                                                  | osa:4327946          | Specific    | - |
| 252 | LOC_Os05g39500.1 | DUF640 domain containing protein, putative, expressed                                                         | osa:107278201        | Up and Down | - |
| 253 | LOC_Os06g39040.1 | dehydrogenase/reductase SDR family member 12, putative, expressed                                             | osa:9267040          | Up and Down | - |
| 254 | LOC_Os07g07860.1 | LTPL76 - Protease inhibitor/seed storage/LTP family protein precursor, expressed                              | osa:4342528          | Up and Down | - |
| 255 | LOC_Os07g17330.1 | B12D protein, putative, expressed                                                                             | osa:4342911          | Up and Down | - |
| 256 | LOC_Os09g39090.1 | vignain precursor, putative, expressed                                                                        | osa:107276064        | Up and Down | - |
| 257 | LOC_Os10g39360.1 | aspartic proteinase nepenthesin precursor, putative, expressed                                                | osa:107275604        | Up and Down | - |
| 258 | LOC_Os10g39390.1 | Eukaryotic aspartyl protease domain containing protein, expressed                                             | osa:107279218        | Up and Down | - |



|     |                  |                                                                                    |                      |             |   |
|-----|------------------|------------------------------------------------------------------------------------|----------------------|-------------|---|
| 259 | LOC_Os10g18760.1 | dirigent, putative, expressed                                                      | osa:9270308          | Up and Down | - |
| 260 | LOC_Os05g45460.1 | POEI52 - Pollen Ole e I allergen and extensin family protein precursor, expressed  | osa:4339414          | Up and Down | - |
| 261 | LOC_Os04g28250.1 | cysteine proteinase inhibitor precursor, putative, expressed                       | osa:4335551          | Up and Down | - |
| 262 | LOC_Os08g13440.1 | cupin domain containing protein, expressed                                         | osa:4344999          | Up and Down | - |
| 263 | LOC_Os03g26820.1 | LTPL52 - Protease inhibitor/seed storage/LTP family protein precursor, expressed   | osa:4332993          | Up and Down | - |
| 264 | LOC_Os06g49100.1 | retrotransposon protein, putative, unclassified, expressed                         | osa:4341996          | Up and Down | - |
| 265 | LOC_Os09g26620.1 | auxin-repressed protein, putative, expressed                                       | osa:4347155          | Up and Down | - |
| 266 | LOC_Os05g02820.1 | protein transport protein-related, putative, expressed                             | osa:107281145        | Up and Down | - |
| 267 | LOC_Os01g14590.1 | pathogen-related protein, putative, expressed                                      | osa:4327214          | Up and Down | - |
| 268 | LOC_Os03g19290.1 | mitochondrial import inner membrane translocase subunit Tim17, putative, expressed | osa:4332597          | Up and Down | - |
| 269 | LOC_Os03g19427.1 | nicotianamine synthase, putative, expressed                                        | osa:4332608          | Up and Down | - |
| 270 | LOC_Os05g18604.1 | OsSCP28 - Putative Serine Carboxypeptidase homologue, expressed                    | osa:4338250          | Up and Down | - |
| 271 | LOC_Os02g03120.1 | endoglucanase, putative, expressed                                                 | dosa:Os02t0123700-01 | Up and Down | - |
| 272 | LOC_Os09g34070.2 | RNA recognition motif containing protein, expressed                                | osa:4347579          | Up          | - |
| 273 | LOC_Os02g15220.1 | bromodomain containing protein, expressed                                          | dosa:Os02t0250300-01 | Up          | - |
| 274 | LOC_Os01g53250.1 | NADPH reductase, putative, expressed                                               | osa:4324160          | Up          | - |
| 275 | LOC_Os11g34120.1 | exportin 1, putative, expressed                                                    | osa:4350677          | Up          | - |
| 276 | LOC_Os08g16600.1 | WD-40 repeat protein family, putative, expressed                                   | osa:4345122          | Up          | - |
| 277 | LOC_Os04g09680.1 | caffeic acid 3-O-methyltransferase, putative, expressed                            | dosa:Os04t0175900-01 | Up          | - |
| 278 | LOC_Os01g60650.1 | non-green plastid inner envelope membrane protein, putative, expressed             | osa:4327612          | Up          | - |
| 279 | LOC_Os03g44520.1 | expressed protein                                                                  | osa:4333573          | Up          | - |
| 280 | LOC_Os03g53360.1 | transferase family protein, putative, expressed                                    | osa:4334082          | Up          | - |
| 281 | LOC_Os09g16090.1 | UDP-glucuronosyl/UDP-glucosyl transferase, putative, expressed                     | osa:4346756          | Up          | - |
| 282 | LOC_Os01g37825.1 | M16 domain containing zinc peptidase, putative, expressed                          | osa:4324677          | Up          | - |
| 283 | LOC_Os11g26750.1 | dehydrin, putative, expressed                                                      | osa:4350451          | Up          | - |
| 284 | LOC_Os05g51450.1 | OsClp8 - Putative Clp protease homologue, expressed                                | osa:4339792          | Up          | - |
| 285 | LOC_Os10g29620.1 | tyrosine protein kinase domain containing protein, putative, expressed             | osa:4348697          | Up          | - |
| 286 | LOC_Os05g01500.1 | tubulin-specific chaperone E, putative, expressed                                  | osa:4337557          | Up          | - |
| 287 | LOC_Os09g38740.1 | expressed protein                                                                  | osa:4347849          | Up          | - |
| 288 | LOC_Os07g38300.1 | ribosome recycling factor, putative, expressed                                     | osa:4343662          | Up          | - |

|     |                  |                                                                                   |                      |    |   |
|-----|------------------|-----------------------------------------------------------------------------------|----------------------|----|---|
| 289 | LOC_Os12g21700.1 | zinc finger C-x8-C-x5-C-x3-H type family protein, expressed                       | osa:4352041          | Up | - |
| 290 | LOC_Os12g26380.1 | dirigent, putative, expressed                                                     | osa:107279766        | Up | - |
| 291 | LOC_Os04g02150.1 | tRNA methyltransferase, putative, expressed                                       | osa:4334938          | Up | - |
| 292 | LOC_Os10g18820.1 | dirigent, putative, expressed                                                     | osa:4348341          | Up | - |
| 293 | LOC_Os04g56430.1 | cysteine-rich receptor-like protein kinase, putative, expressed                   | osa:4337274          | Up | - |
| 294 | LOC_Os06g12990.1 | tRNA methyltransferase, putative, expressed                                       | osa:4340601          | Up | - |
| 295 | LOC_Os07g06970.1 | HEN1, putative, expressed                                                         | dosa:Os07t0164000-01 | Up | - |
| 296 | LOC_Os02g18660.1 | expressed protein                                                                 | osa:4329046          | Up | - |
| 297 | LOC_Os10g18870.1 | dirigent, putative, expressed                                                     | osa:4348342          | Up | - |
| 298 | LOC_Os07g07920.1 | LTPL100 - Protease inhibitor/seed storage/LTP family protein precursor, expressed | osa:4342533          | Up | - |
| 299 | LOC_Os07g07790.1 | LTPL75 - Protease inhibitor/seed storage/LTP family protein precursor, expressed  | osa:9270363          | Up | - |
| 300 | LOC_Os11g26790.1 | dehydrin, putative, expressed                                                     | osa:4350454          | Up | - |
| 301 | LOC_Os08g26110.1 | dirigent, putative, expressed                                                     | obr:102707330        | Up | - |
| 302 | LOC_Os04g24340.1 | phytase, putative, expressed                                                      | osa:4335443          | Up | - |
| 303 | LOC_Os01g07890.1 | expressed protein                                                                 | dosa:Os01t0174100-01 | Up | - |
| 304 | LOC_Os04g24328.1 | jasmonate-induced protein, putative, expressed                                    | osa:9267350          | Up | - |
| 305 | LOC_Os03g46710.1 | expressed protein                                                                 | osa:4333683          | Up | - |
| 306 | LOC_Os04g24319.1 | jasmonate-induced protein, putative, expressed                                    | osa:107276694        | Up | - |
| 307 | LOC_Os06g22100.2 | DNA binding protein, putative, expressed                                          | osa:9271930          | Up | - |
| 308 | LOC_Os05g37270.1 | retrotransposon protein, putative, unclassified, expressed                        | sind:105171171       | Up | - |
| 309 | LOC_Os01g62980.2 | LTPL101 - Protease inhibitor/seed storage/LTP family protein precursor, expressed | dosa:Os01t0849000-02 | Up | - |
| 310 | LOC_Os01g25030.1 | dirigent, putative                                                                | osa:107278107        | Up | - |
| 311 | LOC_Os06g08730.1 | expressed protein                                                                 | osa:4340345          | Up | - |
| 312 | LOC_Os01g56820.1 | AGAP000951-PA, putative, expressed                                                | dosa:Os01t0775600-01 | Up | - |
| 313 | LOC_Os04g40620.1 | peptide methionine sulfoxide reductase, putative, expressed                       | osa:107277650        | Up | - |
| 314 | LOC_Os06g22070.1 | mitochondrial glycoprotein, putative, expressed                                   | osa:4340910          | Up | - |
| 315 | LOC_Os10g28030.1 | OsPOP22 - Putative Prolyl Oligopeptidase homologue, expressed                     | osa:4348628          | Up | - |
| 316 | LOC_Os08g14570.1 | NADPH reductase, putative, expressed                                              | osa:4345047          | Up | - |
| 317 | LOC_Os02g44870.1 | dehydrin, putative, expressed                                                     | osa:4330265          | Up | - |
| 318 | LOC_Os04g25560.1 | OsSCP23 - Putative Serine Carboxypeptidase homologue, expressed                   | osa:4335479          | Up | - |
| 319 | LOC_Os07g27950.1 | RING zinc finger protein, putative, expressed                                     | osa:4343169          | Up | - |
| 320 | LOC_Os03g59080.1 | AMP-binding enzyme, putative, expressed                                           | osa:4334496          | Up | - |
| 321 | LOC_Os07g26110.1 | membrane associated DUF588 domain containing protein, putative, expressed         | osa:4343098          | Up | - |

|     |                  |                                                                                    |                      |    |   |
|-----|------------------|------------------------------------------------------------------------------------|----------------------|----|---|
| 322 | LOC_Os03g38990.1 | DNA-binding protein, putative, expressed                                           | osa:4333346          | Up | - |
| 323 | LOC_Os01g55700.1 | NLI interacting factor-like phosphatase, putative, expressed                       | osa:4327028          | Up | - |
| 324 | LOC_Os04g41950.1 | calcium-binding mitochondrial protein anon-60Da, putative, expressed               | osa:4336282          | Up | - |
| 325 | LOC_Os03g05920.1 | expressed protein                                                                  | osa:4331660          | Up | - |
| 326 | LOC_Os03g52040.2 | OsSCP19 - Putative Serine Carboxypeptidase homologue, expressed                    | osa:9271773          | Up | - |
| 327 | LOC_Os03g63930.1 | acyl carrier protein, putative, expressed                                          | osa:4334838          | Up | - |
| 328 | LOC_Os03g12810.1 | maf, putative, expressed                                                           | osa:9270576          | Up | - |
| 329 | LOC_Os06g49770.1 | LTPL86 - Protease inhibitor/seed storage/LTP family protein precursor, expressed   | osa:4342041          | Up | - |
| 330 | LOC_Os01g03680.1 | BBTI8 - Bowman-Birk type bran trypsin inhibitor precursor, expressed               | osa:4325989          | Up | - |
| 331 | LOC_Os03g51150.1 | expressed protein                                                                  | osa:4333936          | Up | - |
| 332 | LOC_Os02g51300.1 | AP2 domain containing protein, expressed                                           | osa:4330724          | Up | - |
| 333 | LOC_Os03g01660.1 | SKP1, putative, expressed                                                          | osa:4331327          | Up | - |
| 334 | LOC_Os01g63210.1 | SOUL heme-binding protein, putative, expressed                                     | osa:4324804          | Up | - |
| 335 | LOC_Os01g03360.1 | BBTI5 - Bowman-Birk type bran trypsin inhibitor precursor, expressed               | osa:9271230          | Up | - |
| 336 | LOC_Os06g18140.1 | UDP-glucuronosyl and UDP-glucosyl transferase domain containing protein, expressed | osa:4340787          | Up | - |
| 337 | LOC_Os09g32840.1 | nucleotide pyrophosphatase/phosphodiesterase, putative, expressed                  | osa:4347510          | Up | - |
| 338 | LOC_Os07g47510.1 | stress-related protein, putative, expressed                                        | dosa:Os07t0671800-01 | Up | - |
| 339 | LOC_Os08g14200.1 | glycosyl hydrolases family 16, putative, expressed                                 | osa:9271033          | Up | - |
| 340 | LOC_Os01g03390.1 | BBTI7 - Bowman-Birk type bran trypsin inhibitor precursor, expressed               | osa:9267088          | Up | - |
| 341 | LOC_Os01g48850.1 | auxin-responsive protein, putative, expressed                                      | osa:4324390          | Up | - |
| 342 | LOC_Os06g02210.1 | bark storage protein A precursor, putative, expressed                              | osa:4339897          | Up | - |
| 343 | LOC_Os06g19640.1 | 39S ribosomal protein L46, mitochondrial precursor, putative, expressed            | osa:4340823          | Up | - |
| 344 | LOC_Os10g09850.1 | EF hand family protein, putative, expressed                                        | osa:4348196          | Up | - |
| 345 | LOC_Os07g49110.1 | D-alanine--D-alanine ligase family, putative, expressed                            | osa:4344370          | Up | - |
| 346 | LOC_Os01g48680.2 | two pore calcium channel protein 1, putative, expressed                            | osa:4325272          | Up | - |
| 347 | LOC_Os05g08390.1 | expressed protein                                                                  | osa:9270309          | Up | - |
| 348 | LOC_Os06g06000.1 | expressed protein                                                                  | osa:107277456        | Up | - |
| 349 | LOC_Os04g26870.1 | oxidoreductase, aldo/keto reductase family protein, putative, expressed            | dosa:Os04t0337500-01 | Up | - |
| 350 | LOC_Os07g06860.1 | gibberellin receptor GID1L2, putative, expressed                                   | osa:4342463          | Up | - |
| 351 | LOC_Os09g28280.1 | gibberellin receptor GID1L2, putative, expressed                                   | osa:4347255          | Up | - |
| 352 | LOC_Os08g41880.1 | nucleotide pyrophosphatase/phosphodiesterase, putative, expressed                  | osa:4346129          | Up | - |

|     |                  |                                                                       |                      |      |   |
|-----|------------------|-----------------------------------------------------------------------|----------------------|------|---|
| 353 | LOC_Os12g31780.1 | nitrilase-associated protein, putative, expressed                     | osa:4352277          | Up   | - |
| 354 | LOC_Os03g63450.1 | snRK1-interacting protein 1, putative, expressed                      | osa:4334803          | Up   | - |
| 355 | LOC_Os04g22080.1 | retrotransposon protein, putative, unclassified, expressed            | osa:4335390          | Up   | - |
| 356 | LOC_Os06g34790.1 | DUF538 domain containing protein, putative, expressed                 | osa:4341223          | Up   | - |
| 357 | LOC_Os07g43070.1 | expressed protein                                                     | osa:4343957          | Up   | - |
| 358 | LOC_Os10g35190.1 | ZOS10-06 - C2H2 zinc finger protein, expressed                        | osa:4348994          | Up   | - |
| 359 | LOC_Os08g02060.1 | expressed protein                                                     | osa:4344492          | Up   | - |
| 360 | LOC_Os08g31860.1 | expressed protein                                                     | osa:4345562          | Up   | - |
| 361 | LOC_Os02g06930.1 | protein kinase, putative, expressed                                   | osa:4328408          | Up   | - |
| 362 | LOC_Os07g01560.1 | transporter family protein, putative, expressed                       | osa:4342198          | Up   | - |
| 363 | LOC_Os01g18744.1 | transferase family protein, putative, expressed                       | osa:4325160          | Up   | - |
| 364 | LOC_Os02g52290.1 | peptidyl-prolyl cis-trans isomerase, FKBP-type, putative, expressed   | osa:4330800          | Up   | - |
| 365 | LOC_Os11g01600.1 | macrophage migration inhibitory factor, putative, expressed           | osa:4351273          | Up   | - |
| 366 | LOC_Os09g28720.1 | alpha/beta hydrolase fold, putative, expressed                        | osa:4347291          | Up   | - |
| 367 | LOC_Os07g29610.1 | PQ loop repeat domain containing protein, expressed                   | osa:4343225          | Up   | - |
| 368 | LOC_Os02g43660.1 | plastocyanin-like domain containing protein, putative, expressed      | osa:4330178          | Up   | - |
| 369 | LOC_Os07g46910.1 | sex determination protein tasselseed-2, putative, expressed           | osa:4344203          | Up   | - |
| 370 | LOC_Os06g35650.1 | reticuline oxidase-like protein precursor, putative, expressed        | osa:4341259          | Up   | - |
| 371 | LOC_Os07g38620.1 | pyridoxamine 5'-phosphate oxidase family protein, putative, expressed | osa:4343688          | Up   | - |
| 372 | LOC_Os02g28900.1 | cytokinin-O-glucosyltransferase 2, putative, expressed                | osa:4329386          | Up   | - |
| 373 | LOC_Os07g26630.1 | aquaporin protein, putative, expressed                                | osa:4343119          | Up   | - |
| 374 | LOC_Os10g28120.1 | glycosyl hydrolase, putative, expressed                               | osa:4348634          | Up   | - |
| 375 | LOC_Os12g40490.1 | LIM domain-containing protein, putative, expressed                    | osa:4352699          | Up   | - |
| 376 | LOC_Os05g45110.1 | anthocyanidin 5,3-O-glucosyltransferase, putative, expressed          | osa:107276526        | Up   | - |
| 377 | LOC_Os08g03520.1 | retrotransposon protein, putative, Ty1-copia subclass, expressed      | osa:4344581          | Up   | - |
| 378 | LOC_Os10g37240.2 | expressed protein                                                     | dosa:Os10t0516500-01 | Up   | - |
| 379 | LOC_Os03g46190.2 | parafibromin, putative, expressed                                     | osa:4333654          | Up   | - |
| 380 | LOC_Os01g74460.1 | vacuolar fusion protein MON1 homolog A, putative, expressed           | osa:4324304          | Up   | - |
| 381 | LOC_Os03g46770.1 | RNA recognition motif containing protein, expressed                   | osa:4333690          | Up   | - |
| 382 | LOC_Os04g37690.1 | RNA recognition motif containing protein, putative, expressed         | dosa:Os04t0449900-01 | Down | - |
| 383 | LOC_Os11g47970.1 | AAA-type ATPase family protein, putative, expressed                   | osa:4351224          | Down | - |
| 384 | LOC_Os09g36350.1 | endoglucanase, putative, expressed                                    | osa:4347685          | Down | - |
| 385 | LOC_Os08g28190.1 | actin, putative, expressed                                            | osa:4345402          | Down | - |

|     |                  |                                                                                    |                          |      |   |
|-----|------------------|------------------------------------------------------------------------------------|--------------------------|------|---|
| 386 | LOC_Os05g02940.1 | calcium-transporting ATPase 2, endoplasmic reticulum-type, putative, expressed     | osa:4337647              | Down | - |
| 387 | LOC_Os01g45830.1 | sulfate transporter, putative, expressed                                           | osa:4325919              | Down | - |
| 388 | LOC_Os03g06980.1 | nucleic acid binding protein, putative, expressed                                  | dosa:Os03t01660<br>00-01 | Down | - |
| 389 | LOC_Os02g32690.1 | pleiotropic drug resistance protein 15, putative, expressed                        | egu:105040086            | Down | - |
| 390 | LOC_Os04g52540.1 | retrotransposon protein, putative, unclassified, expressed                         | osa:4336991              | Down | - |
| 391 | LOC_Os06g19620.1 | SFT2, putative, expressed                                                          | osa:4340821              | Down | - |
| 392 | LOC_Os01g70840.2 | esterase, putative, expressed                                                      | osa:4326787              | Down | - |
| 393 | LOC_Os10g26660.1 | expressed protein                                                                  | osa:4348588              | Down | - |
| 394 | LOC_Os05g22990.1 | expressed protein                                                                  | osa:4338325              | Down | - |
| 395 | LOC_Os06g38550.1 | expressed protein                                                                  | osa:4341393              | Down | - |
| 396 | LOC_Os01g42030.1 | mitochondrial chaperone BCS1, putative, expressed                                  | osa:4324105              | Down | - |
| 397 | LOC_Os05g04584.1 | transferase family protein, putative, expressed                                    | osa:4337739              | Down | - |
| 398 | LOC_Os07g45950.1 | expressed protein                                                                  | dosa:Os07t06530<br>00-00 | Down | - |
| 399 | LOC_Os04g14654.1 | Sec1 family transport protein, putative, expressed                                 | dosa:Os04t02230<br>00-01 | Down | - |
| 400 | LOC_Os01g20206.1 | methyltransferase, putative, expressed                                             | osa:107278642            | Down | - |
| 401 | LOC_Os01g41810.1 | cytochrome P450 72A1, putative, expressed                                          | osa:4324604              | Down | - |
| 402 | LOC_Os02g18820.1 | WD domain, G-beta repeat domain containing protein, expressed                      | osa:4329056              | Down | - |
| 403 | LOC_Os05g38720.1 | Lung seven transmembrane receptor domain containing protein, putative, expressed   | osa:4339027              | Down | - |
| 404 | LOC_Os11g25454.1 | cytokinin-N-glucosyltransferase 1, putative, expressed                             | osa:4350423              | Down | - |
| 405 | LOC_Os01g45110.1 | anthocyanin 3-O-beta-glucosyltransferase, putative, expressed                      | osa:4326578              | Down | - |
| 406 | LOC_Os09g37200.1 | transferase family protein, putative, expressed                                    | osa:4347748              | Down | - |
| 407 | LOC_Os09g36300.1 | OsLonP4 - Putative Lon protease homologue, expressed                               | osa:4347683              | Down | - |
| 408 | LOC_Os01g65700.1 | expressed protein                                                                  | osa:4324836              | Down | - |
| 409 | LOC_Os02g14929.1 | T-complex protein, putative, expressed                                             | osa:4328872              | Down | - |
| 410 | LOC_Os05g02060.1 | mitochondrial import inner membrane translocase subunit Tim17, putative, expressed | osa:4337595              | Down | - |
| 411 | LOC_Os03g30430.1 | nitrilase-associated protein, putative, expressed                                  | osa:9269934              | Down | - |
| 412 | LOC_Os04g42840.1 | HEAT repeat family protein, putative, expressed                                    | osa:4336347              | Down | - |
| 413 | LOC_Os09g36860.1 | acyl carrier protein, putative, expressed                                          | osa:4347723              | Down | - |
| 414 | LOC_Os02g01790.2 | expressed protein                                                                  | osa:4328027              | Down | - |
| 415 | LOC_Os04g50890.1 | secretory carrier-associated membrane protein, putative, expressed                 | osa:4336849              | Down | - |
| 416 | LOC_Os01g50200.1 | UDP-glucuronosyl and UDP-glucosyl transferase domain containing protein, expressed | osa:4325293              | Down | - |
| 417 | LOC_Os09g28160.1 | phosphate carrier protein, mitochondrial precursor, putative, expressed            | osa:4347248              | Down | - |



|     |                  |                                                                                    |                      |      |   |
|-----|------------------|------------------------------------------------------------------------------------|----------------------|------|---|
| 418 | LOC_Os06g49140.1 | ribosomal RNA large subunit methyltransferase J, putative, expressed               | osa:4342000          | Down | - |
| 419 | LOC_Os01g12940.1 | phosphorylase domain containing protein, putative, expressed                       | obr:102700482        | Down | - |
| 420 | LOC_Os02g12760.1 | integral membrane protein, putative, expressed                                     | osa:9269252          | Down | - |
| 421 | LOC_Os04g36660.1 | calmodulin binding protein, putative, expressed                                    | osa:4335948          | Down | - |
| 422 | LOC_Os05g32130.1 | expressed protein                                                                  | obr:102712909        | Down | - |
| 423 | LOC_Os05g19910.1 | transferase family protein, putative, expressed                                    | osa:4338283          | Down | - |
| 424 | LOC_Os06g14490.1 | calmodulin-binding heat-shock protein, putative, expressed                         | dosa:Os06t0256300-01 | Down | - |
| 425 | LOC_Os02g38820.1 | expressed protein                                                                  | osa:4329888          | Down | - |
| 426 | LOC_Os05g37230.1 | retrotransposon protein, putative, Ty3-gypsy subclass, expressed                   | bdi:106866389        | Down | - |
| 427 | LOC_Os11g06760.1 | protein of unknown function domain containing protein, expressed                   | osa:4349880          | Down | - |
| 428 | LOC_Os12g28137.1 | ATPase 3, putative, expressed                                                      | osa:107275748        | Down | - |
| 429 | LOC_Os07g36200.1 | eukaryotic translation initiation factor-related, putative, expressed              | osa:4343524          | Down | - |
| 430 | LOC_Os10g30560.1 | UDP-glucuronosyl and UDP-glucosyl transferase domain containing protein, expressed | dosa:Os10t0442400-01 | Down | - |
| 431 | LOC_Os01g70200.1 | exostosin family domain containing protein, expressed                              | osa:4327243          | Down | - |
| 432 | LOC_Os05g07040.1 | PHD finger protein, putative, expressed                                            | osa:4337899          | Down | - |
| 433 | LOC_Os02g45110.1 | MT-A70 domain containing protein, expressed                                        | osa:4330284          | Down | - |
| 434 | LOC_Os01g09540.1 | HAD superfamily phosphatase, putative, expressed                                   | osa:4327297          | Down | - |
| 435 | LOC_Os06g37640.1 | expressed protein                                                                  | osa:4341363          | Down | - |
| 436 | LOC_Os03g62090.1 | CESA5 - cellulose synthase, expressed                                              | osa:4334710          | Down | - |
| 437 | LOC_Os04g57020.1 | expressed protein                                                                  | osa:4337320          | Down | - |
| 438 | LOC_Os03g45720.1 | glyoxalase family protein, putative, expressed                                     | osa:4333625          | Down | - |
| 439 | LOC_Os08g02080.1 | rickettsia 17 kDa surface antigen family protein, expressed                        | osa:4344494          | Down | - |
| 440 | LOC_Os10g42940.1 | miro, putative, expressed                                                          | osa:4349518          | Down | - |
| 441 | LOC_Os04g40490.1 | glycosyl hydrolase family 5 protein, putative, expressed                           | osa:4336181          | Down | - |
| 442 | LOC_Os06g21550.1 | thioredoxin domain-containing protein 17, putative, expressed                      | osa:4340888          | Down | - |
| 443 | LOC_Os09g39960.1 | dynamin family protein, putative, expressed                                        | osa:4347929          | Down | - |
| 444 | LOC_Os05g50490.1 | X8 domain containing protein, expressed                                            | osa:4339730          | Down | - |
| 445 | LOC_Os11g02150.1 | saposin-like type B, region 1 family protein, putative, expressed                  | osa:4349589          | Down | - |
| 446 | LOC_Os06g38940.1 | RMD5 homolog A, putative, expressed                                                | osa:4341403          | Down | - |
| 447 | LOC_Os04g59394.1 | expressed protein                                                                  | osa:4337495          | Down | - |
| 448 | LOC_Os01g37000.1 | carboxyl-terminal peptidase, putative, expressed                                   | osa:4325841          | Down | - |
| 449 | LOC_Os03g55110.1 | 26S proteasome non-ATPase regulatory subunit 10, putative, expressed               | osa:4334173          | Down | - |
| 450 | LOC_Os01g51570.1 | glycosyl hydrolases family 17, putative, expressed                                 | osa:4325938          | Down | - |

|     |                  |                                                                                   |             |      |   |
|-----|------------------|-----------------------------------------------------------------------------------|-------------|------|---|
| 451 | LOC_Os10g40710.1 | expansin precursor, putative, expressed                                           | osa:4349348 | Down | - |
| 452 | LOC_Os05g09580.1 | expressed protein                                                                 | osa:4338014 | Down | - |
| 453 | LOC_Os07g44940.1 | ATP12 ATPase, putative, expressed                                                 | osa:4344085 | Down | - |
| 454 | LOC_Os02g08490.1 | chaperone protein clpB 1, putative, expressed                                     | osa:4328515 | Down | - |
| 455 | LOC_Os07g38580.1 | zinc finger family protein, putative, expressed                                   | osa:4343683 | Down | - |
| 456 | LOC_Os10g32700.1 | hypersensitive-induced response protein, putative, expressed                      | osa:4348831 | Down | - |
| 457 | LOC_Os06g39140.1 | hemoglobin-like protein HbO, putative, expressed                                  | osa:4341418 | Down | - |
| 458 | LOC_Os05g13970.2 | phosphorylase domain containing protein, putative, expressed                      | osa:4338154 | Down | - |
| 459 | LOC_Os03g42130.1 | gibberellin 20 oxidase 2, putative, expressed                                     | osa:4333459 | Down | - |
| 460 | LOC_Os05g31140.1 | glycosyl hydrolases family 17, putative, expressed                                | osa:4338611 | Down | - |
| 461 | LOC_Os02g45480.1 | nucleic acid binding protein, putative, expressed                                 | osa:9271844 | Down | - |
| 462 | LOC_Os03g58790.1 | ATPase, putative, expressed                                                       | osa:4334467 | Down | - |
| 463 | LOC_Os02g40500.1 | OsGrx_C2.1 - glutaredoxin subgroup I, expressed                                   | osa:4329999 | Down | - |
| 464 | LOC_Os01g56420.1 | ctr copper transporter family protein, putative, expressed                        | osa:4324610 | Down | - |
| 465 | LOC_Os01g62260.1 | thaumatin, putative, expressed                                                    | osa:4327387 | Down | - |
| 466 | LOC_Os09g39070.1 | thiol protease SEN102 precursor, putative, expressed                              | osa:4347868 | Down | - |
| 467 | LOC_Os02g58250.1 | expressed protein                                                                 | osa:4331238 | Down | - |
| 468 | LOC_Os10g36690.4 | dehydration response related protein, putative, expressed                         | osa:4349089 | Down | - |
| 469 | LOC_Os05g36010.1 | OsSub47 - Putative Subtilisin homologue, expressed                                | osa:4338899 | Down | - |
| 470 | LOC_Os06g16280.1 | expressed protein                                                                 | osa:4340740 | Down | - |
| 471 | LOC_Os10g42630.1 | expressed protein                                                                 | osa:4349495 | Down | - |
| 472 | LOC_Os02g33820.1 | abscisic stress-ripening, putative, expressed                                     | osa:4329601 | Down | - |
| 473 | LOC_Os01g15340.1 | flowering promoting factor-like 1, putative, expressed                            | osa:4326229 | Down | - |
| 474 | LOC_Os02g57470.1 | tetratricopeptide repeat containing protein, putative, expressed                  | osa:4331168 | Down | - |
| 475 | LOC_Os04g24600.1 | cysteine proteinase 1 precursor, putative, expressed                              | osa:4335455 | Down | - |
| 476 | LOC_Os05g47700.1 | LTPL152 - Protease inhibitor/seed storage/LTP family protein precursor, expressed | osa:4339526 | Down | - |
| 477 | LOC_Os01g08470.1 | retrotransposon protein, putative, unclassified, expressed                        | osa:4325349 | Down | - |
| 478 | LOC_Os11g44430.1 | protein kinase, putative, expressed                                               | osa:4351079 | Down | - |
| 479 | LOC_Os05g34500.1 | expressed protein                                                                 | osa:9268643 | Down | - |
| 480 | LOC_Os05g01600.2 | actin, putative, expressed                                                        | osa:4337566 | Down | - |
| 481 | LOC_Os01g06460.1 | uncharacterized Cys-rich domain containing protein, putative, expressed           | osa:4324087 | Down | - |
| 482 | LOC_Os03g56500.1 | expressed protein                                                                 | osa:4334292 | Down | - |
| 483 | LOC_Os03g63700.1 | AIG2-like family domain containing protein, expressed                             | osa:4334822 | Down | - |
| 484 | LOC_Os06g19650.1 | expressed protein                                                                 | osa:4340824 | Down | - |

|     |                  |                                                                                       |                          |      |   |
|-----|------------------|---------------------------------------------------------------------------------------|--------------------------|------|---|
| 485 | LOC_Os05g49840.1 | phospholipase, putative, expressed                                                    | osa:4339680              | Down | - |
| 486 | LOC_Os01g71090.1 | xylanase inhibitor, putative, expressed                                               | osa:4326530              | Down | - |
| 487 | LOC_Os04g44900.1 | lectin-like receptor kinase, putative, expressed                                      | osa:4336489              | Down | - |
| 488 | LOC_Os08g42590.3 | mtN19, putative, expressed                                                            | osa:4346175              | Down | - |
| 489 | LOC_Os07g29450.1 | expressed protein                                                                     | dosa:Os07t04775<br>00-01 | Down | - |
| 490 | LOC_Os11g01140.1 | AGC_PVPK_like_kin82y.18 - ACG kinases include homologs to PKA, PKG and PKC, expressed | osa:4349531              | Down | - |
| 491 | LOC_Os06g12180.1 | jacalin-like lectin domain containing protein, expressed                              | osa:9269817              | Down | - |
| 492 | LOC_Os07g41340.1 | B12D protein, putative, expressed                                                     | osa:4343847              | Down | - |
| 493 | LOC_Os03g25480.1 | cytochrome P450, putative, expressed                                                  | osa:4332937              | Down | - |
| 494 | LOC_Os02g38050.1 | joka2, putative, expressed                                                            | osa:4329846              | Down | - |
| 495 | LOC_Os02g40710.1 | ammonium transporter protein, putative, expressed                                     | osa:4330007              | Down | - |
| 496 | LOC_Os01g71860.1 | glycosyl hydrolases family 17, putative, expressed                                    | osa:4325834              | Down | - |
| 497 | LOC_Os04g40500.1 | glycosyl hydrolase family 5 protein, putative, expressed                              | osa:107276528            | Down | - |
| 498 | LOC_Os07g19530.1 | peptidase, putative, expressed                                                        | osa:4342962              | Down | - |
| 499 | LOC_Os02g40730.1 | ammonium transporter protein, putative, expressed                                     | osa:4330008              | Down | - |
| 500 | LOC_Os03g15340.1 | plastocyanin-like domain containing protein, putative, expressed                      | osa:4332309              | Down | - |
| 501 | LOC_Os01g21070.1 | endoglucanase, putative, expressed                                                    | osa:4327286              | Down | - |
| 502 | LOC_Os03g54000.1 | oligopeptide transporter, putative, expressed                                         | osa:4334129              | Down | - |
| 503 | LOC_Os04g44910.1 | receptor like protein kinase, putative, expressed                                     | osa:4336490              | Down | - |
| 504 | LOC_Os11g39450.1 | cysteine-rich receptor-like protein kinase 7 precursor, putative, expressed           | dosa:Os11t06083<br>00-01 | Down | - |
| 505 | LOC_Os07g34900.1 | aspartic proteinase nepenthesin precursor, putative, expressed                        | dosa:Os07t05333<br>00-00 | Down | - |
| 506 | LOC_Os12g38770.1 | nucleotide pyrophosphatase/phosphodiesterase, putative, expressed                     | osa:9268839              | Down | - |
| 507 | LOC_Os10g39380.1 | aspartic proteinase nepenthesin-1 precursor, putative, expressed                      | osa:107276470            | Down | - |
| 508 | LOC_Os04g33060.1 | NAD dependent epimerase/dehydratase family protein, putative, expressed               | osa:4335739              | Down | - |
| 509 | LOC_Os03g16960.1 | cysteine-rich repeat secretory protein 55 precursor, putative, expressed              | osa:4332423              | Down | - |
| 510 | LOC_Os01g70850.1 | esterase, putative, expressed                                                         | osa:4326788              | Down | - |
| 511 | LOC_Os07g48500.1 | stress responsive protein, putative, expressed                                        | dosa:Os07t06840<br>00-01 | Down | - |
| 512 | LOC_Os07g36130.1 | core histone H2A/H2B/H3/H4, putative, expressed                                       | osa:4343518              | Down | - |
| 513 | LOC_Os06g12590.1 | protein kinase, putative, expressed                                                   | osa:4340578              | Down | - |

---

**Table S2** List of the primers used in this study.

| <b>Primers</b>   | <b>Forward</b>                | <b>Reverse primer</b>        |
|------------------|-------------------------------|------------------------------|
| LOC_Os11g11960.1 | 5'-ATCCCTAAGTTGGTGTTCATCTC-3' | 5'-TTTAGTTTGGGGAATGCCTTTG-3' |
| LOC_Os02g46090.1 | 5'-ATGGCAGTGGTTATATTACGGT-3'  | 5'-ATGCGACCATCATTATCCTGAT-3' |
| LOC_Os09g14510.1 | 5'-TATGCCTGAAGTGGAACCTTT-3'   | 5'-TGTTCTAATGGCAAAATTCGGG-3' |
| LOC_Os01g06600.1 | 5'-GAATTGTTGGGTGGAAATGGAA-3'  | 5'-CGTATGTGCCTTCGTATGAGTA-3' |
| LOC_Os09g23560.1 | 5'-TCCTAGGCTCCTAGCTATGTAG-3'  | 5'-TTTCAAGTTTCCATCGTGTACG-3' |
| LOC_Os10g06540.1 | 5'-CCTCCACCATGCAAGACAGT-3'    | 5'-TCCACAGAAAGCAGCGATGA-3'   |
| LOC_Os05g15530.1 | 5'-ATCTGCATCCAAAGCAAAGATC-3'  | 5'-TACTTGATCGAGCCATTCCTG-3'  |
| LOC_Os03g39850.1 | 5'-GCTCAAGGGAGTAGCTTATGAG-3'  | 5'-CTTCTTGTGGATGGGGTTCTT-3'  |
| LOC_Os01g22490.1 | 5'-ACCACTTCGACCGCCACTACT-3'   | 5'-ACGCCTAAGCCTGCTGGTT-3'    |
